# Supplementary material
Source: Research Square preprint supplement (doi:10.21203/rs.3.rs-9128298/v1)
Supplement: Supplementary file 1 [file 309edb7df6d73350549ac999.xlsx]

## Sheet: Sheet1
Table S3 Datasets filtered by VIP, CI, and FDR based on PLS-DA
Metabolite	VIP	VIP_Lower_95CI	VIP_Upper_95CI	ANOVA_p_value	FDR_Adjusted_p
6-Tridecanone	1.98026	1.78093	2.17958	8.75594e-13	1.89049e-10
Naphthalene, 1,2,3,4-tetrahydro-5-methyl-1-(1-methylethyl)-	1.96559	1.48429	2.44688	7.53606e-10	8.94907e-08
Ethyl cyclohexanepropionate	1.96218	1.80311	2.12125	2.83603e-09	2.28256e-07
2-Heptadecanone	1.9611	1.57151	2.3507	9.84293e-10	1.11319e-07
2-(4-Methoxyphenyl)ethanol	1.95451	1.61888	2.29014	1.93982e-09	1.91961e-07
Propanoic acid, 2-hydroxy-, ethyl ester	1.95156	1.4288	2.47432	6.19791e-10	7.74738e-08
Benzenebutanenitrile	1.9496	1.47806	2.42115	1.8364e-09	1.89629e-07
Heptane	1.92238	1.77154	2.07322	5.3262e-10	7.44102e-08
Cyclobutaneethanol, 1-methyl-2-(1-methylethenyl)-, cis-	1.89378	1.52547	2.26209	4.09795e-10	6.0829e-08
Naphthalene, 1,6-dimethyl-4-(1-methylethyl)-	1.87944	1.69219	2.0667	2.88323e-09	2.28256e-07
Anabasine, 1-nitroso-	1.87653	1.24261	2.51044	2.64055e-08	1.27986e-06
Ethyl trans-2-decenoate	1.86918	1.56672	2.17165	3.63822e-10	5.76052e-08
Stemphol	1.8564	1.35123	2.36157	1.32046e-08	8.18323e-07
1-Hexadecanol	1.85484	1.67523	2.03445	1.38539e-10	2.74191e-08
Thiazole, 5-butyl-	1.85205	1.40122	2.30289	1.58596e-08	8.75967e-07
Propanoic acid, 2-methyl-, ethyl ester	1.85052	1.71626	1.98478	1.40514e-14	3.3372e-12
Butanoic acid, 2-methyl-, ethyl ester	1.84608	1.72401	1.96814	1.50893e-15	3.98189e-13
Decanoic acid, hexyl ester	1.84324	1.74487	1.94161	2.58768e-32	6.14575e-29
Benzene, 1-ethyl-3-methyl-	1.84132	1.74118	1.94146	3.31669e-27	3.93856e-24
Hexyl tiglate	1.84096	1.74261	1.93932	2.40572e-26	1.90452e-23
9-Oxabicyclo[3.3.1]nona-2,6-diene	1.83873	1.73753	1.93994	4.0235e-25	2.38895e-22
L-Leucine, ethyl ester	1.83849	1.73679	1.94018	5.10148e-24	2.42321e-21
Hexadecanoic acid, propyl ester	1.83394	1.73343	1.93446	2.6238e-21	1.03859e-18
Butane, 1-methoxy-3-methyl-	1.82981	1.72485	1.93477	9.69124e-20	3.2881e-17
Diethyl azelate	1.828	1.57777	2.07822	9.12528e-07	3.01008e-05
4-Tridecen-1-ol, acetate, (E)-	1.82433	1.57338	2.07527	1.06016e-08	6.99409e-07
2-Methyl-3-furanthiol	1.81876	1.72344	1.91408	3.91643e-17	1.16269e-14
1,3-Dioxepane, 2-heptyl-	1.80741	1.58683	2.02799	1.38963e-06	4.12545e-05
3-(4-Methoxyphenyl)propionic acid ethyl ester	1.77635	1.48848	2.06422	3.95069e-06	9.42466e-05
Hexadecanoic acid, methyl ester	1.7727	1.67777	1.86763	4.22123e-06	9.62467e-05
Cyclopentanone, 3,3,4-trimethyl-4-(4-methylphenyl)-	1.77138	1.41797	2.12479	3.42481e-07	1.35565e-05
Hexanoic acid, propyl ester	1.77056	1.4801	2.06101	8.62798e-08	3.79472e-06
1-Pentanol, 3,4-dimethyl-	1.7697	1.65081	1.88859	2.1506e-09	2.04307e-07
4-Hydroxy-a-Thujone	1.76358	1.67979	1.84736	2.86291e-09	2.28256e-07
3,5-Dimethyl-2,4,6-trichloroanisole	1.74933	1.34761	2.15106	9.51784e-06	0.000190511
Cyclopentene,1-hexyl-	1.74699	1.44011	2.05387	8.70949e-06	0.000183053
Pyridine, 3-ethenyl-	1.74652	1.19729	2.29575	3.6125e-06	8.93717e-05
Pentanoic acid, ethyl ester	1.746	1.54075	1.95125	9.72605e-06	0.000190511
Ethyl tridecanoate	1.74445	1.36057	2.12833	9.66963e-06	0.000190511
Ethyl decyne carbonate	1.74107	1.49568	1.98646	1.51341e-10	2.76489e-08
Ethyl 5-methylhexanoate	1.73671	1.33011	2.1433	1.32314e-06	3.9778e-05
Octane	1.73278	1.59588	1.86967	1.15906e-06	3.57504e-05
Dodecanoic acid, hexyl ester	1.73263	1.45676	2.00849	1.75855e-10	2.98326e-08
3-Hepten-1-ol, (Z)-	1.72797	1.24887	2.20708	3.86735e-06	9.37241e-05
3-Decen-2-one, 3-methyl-	1.71738	1.41181	2.02296	6.13765e-10	7.74738e-08
Diethyl pimelate	1.71732	1.41348	2.02115	1.21714e-09	1.31396e-07
Spiro[3.6]deca-5,7-dien-1-one,5,9,9-trimethyl	1.71232	1.15027	2.27436	4.08733e-06	9.42466e-05
Ethyl 2-methylcyclopropanecarboxylate	1.70632	1.43335	1.97928	2.51531e-09	2.28256e-07
2H-Pyran, 2-ethoxytetrahydro-4-methyl-	1.70554	1.43134	1.97974	3.59099e-07	1.39813e-05
Butanoic acid, 3-methyl-, ethyl ester	1.70411	1.51039	1.89783	8.73345e-07	2.9214e-05
Nonane	1.70309	1.58361	1.82256	2.88563e-06	7.70041e-05
10-Undecenoyl chloride	1.70134	1.14461	2.25808	5.48681e-06	0.000120659
Azelaaldehydic acid, butyl ester	1.69832	1.63109	1.76556	2.78589e-09	2.28256e-07
2H-Pyran-3(4H)-one, 6-ethenyldihydro-2,2,6-trimethyl-	1.69605	1.05952	2.33258	1.1342e-05	0.000201025
Ethanone, 1-(3-pyridinyl)-	1.69533	1.44329	1.94737	3.87704e-09	2.87749e-07
n-Amyl ether	1.69438	1.32759	2.06118	4.00712e-09	2.88391e-07
3-Undecanone	1.69422	1.37857	2.00986	3.54588e-06	8.86471e-05
Methyl 11-oxo-9-undecenoate	1.69337	1.30303	2.08371	3.18807e-09	2.44248e-07
2(5H)-Furanone	1.69263	1.05458	2.33067	1.0868e-05	0.00019708
2-Pentenal, (E)-	1.68781	1.34756	2.02807	9.07869e-09	6.16054e-07
2-ACETYLDECANOIC ACID, ETHYL ESTER	1.68341	1.03116	2.33565	3.28831e-06	8.39757e-05
Pyridine, 3-ethyl-	1.6827	1.5585	1.80691	1.09514e-05	0.00019708
5-Ethyl bicyclo[2.2.1]-2-heptene	1.67933	1.25326	2.1054	7.78221e-09	5.4361e-07
Ethyl cyclopropanecarboxylate	1.67782	1.50893	1.84671	6.19576e-08	2.88528e-06
1-Butanol	1.67382	1.39187	1.95576	4.52116e-05	0.00067111
2-Nonenoic acid, 2-methyl-, ethyl ester	1.67363	1.31477	2.03249	2.12959e-08	1.07612e-06
Benzenamine, N,N-dibutyl-	1.67346	1.29431	2.05261	1.52538e-08	8.62564e-07
1,2-Cyclohexanediol, 1-methyl-, trans-	1.67317	1.22725	2.11909	1.32705e-08	8.18323e-07
2-Pyridinecarboxylic acid, ethyl ester	1.67295	1.22789	2.118	1.37823e-08	8.18323e-07
Dodecanedioic acid, dimethyl ester	1.67287	1.05306	2.29268	9.86549e-06	0.000190511
Cyclohexanol, 2-methyl-, trans-	1.67189	1.22568	2.1181	1.41371e-08	8.18916e-07
Benzene, 1,3-dimethoxy-5-(8Z)-8-pentadecen-1-yl-	1.67173	1.33315	2.0103	1.3766e-08	8.18323e-07
Butanoic acid, 3-methyl-, propyl ester	1.66892	1.21248	2.12535	1.64008e-08	8.85269e-07
2-Dodecanone	1.66816	1.45498	1.88133	1.78543e-06	5.1089e-05
1-Octene, 3,7-dimethyl-	1.66743	1.21054	2.12432	1.74352e-08	9.20189e-07
Tetradecanoic acid, propyl ester	1.66587	1.22939	2.10234	1.98444e-08	1.02458e-06
4-(Propan-2-yloxy)phenol	1.66469	1.10436	2.22502	1.10365e-05	0.00019708
4-Quinolinecarboxaldehyde	1.66458	1.47449	1.85467	7.31766e-08	3.3422e-06
Pentanoic acid, propyl ester	1.66313	1.22914	2.09713	2.31779e-08	1.14682e-06
Butane, 1,1-diethoxy-3-methyl-	1.66268	1.41071	1.91464	1.14803e-06	3.57504e-05
1-(1,2,3-Trimethyl-cyclopent-2-enyl)-ethanone	1.66015	1.4404	1.8799	4.89811e-08	2.3266e-06
Indole	1.65971	1.37203	1.9474	2.5593e-06	7.15099e-05
p-Cresol	1.65424	1.21682	2.09167	1.21772e-07	5.25835e-06
beta-Myrcene	1.65033	1.44817	1.85249	1.58804e-06	4.5995e-05
Ethane, 1,1-diethoxy-	1.64896	1.41857	1.87936	8.16216e-07	2.7693e-05
Isobutyl acetate	1.646	1.44159	1.85041	3.16275e-07	1.27314e-05
3-Pentanol, 3-methyl-	1.64593	1.21759	2.07426	3.40997e-05	0.000519146
n-Propyl acetate	1.64361	1.32512	1.96209	7.89148e-08	3.53628e-06
2(3H)-Furanone, dihydro-5-(2-octenyl)-, (Z)-	1.64339	1.41737	1.86941	9.06606e-06	0.000188017
Ethaneperoxoic acid, 1-cyano-1-[2-(2-phenyl-1,3-dioxolan-2-yl)ethyl]pentyl ester	1.64323	1.12393	2.16253	6.88976e-05	0.000940413
Propanoic acid, ethyl ester	1.64259	1.45982	1.82537	4.0876e-07	1.52555e-05
Benzenepropanoic acid, ethyl ester	1.64245	1.35347	1.93143	5.36665e-05	0.000772472
Cyclopropaneacetic acid, 2-hexyl-	1.64058	1.35716	1.92399	2.1422e-07	8.92584e-06
Thiazole, 5-ethenyl-4-methyl-	1.63964	1.17401	2.10527	2.33163e-07	9.54762e-06
1-Tetradecene	1.63903	1.30856	1.9695	7.28986e-05	0.000983717
aR-Turmerone	1.62938	1.33445	1.92431	4.04514e-07	1.52555e-05
Pentane, 1,1-diethoxy-	1.62171	1.47894	1.76448	9.87075e-07	3.21137e-05
12-Oxododecanoic acid, ethyl ester	1.62034	1.37871	1.86197	1.70049e-07	7.21191e-06
10,11-Epoxycalamenene	1.61897	1.29659	1.94135	3.89446e-05	0.000585401
n-Caprylic acid isobutyl ester	1.61753	1.20359	2.03147	0.000137306	0.00165534
2-Methyl-7-exo-vinylbicyclo[4.2.0]oct-1(2)-ene	1.61344	1.29758	1.92929	6.58047e-07	2.29833e-05
Benzenamine, N-propyl-	1.61094	1.01033	2.21154	6.56717e-05	0.000906805
Tridecanal	1.60606	1.46955	1.74258	1.13545e-06	3.57504e-05
Tetradecanal	1.60599	1.41185	1.80013	6.4887e-06	0.000138835
2,4-Nonadienal, (E,E)-	1.60341	1.38041	1.8264	4.11096e-07	1.52555e-05
2-Heptenoic acid	1.60283	1.19588	2.00979	0.000110085	0.0013907
Cyclohexane, ethoxy-	1.60145	1.4326	1.77031	6.89794e-07	2.37429e-05
4-Decenoic acid, 3-methyl-, (E)-	1.60079	1.30138	1.90019	2.77644e-06	7.49323e-05
5-Hydroxy-2-pyridinecarbaldehyde	1.5995	1.27194	1.92705	5.51386e-07	1.98415e-05
Copaene	1.59723	1.20402	1.99045	0.000192823	0.0021704
6-Tridecanol	1.59471	1.39422	1.7952	2.94314e-06	7.75966e-05
Undecanoic acid, ethyl ester	1.59468	1.14208	2.04728	0.000197539	0.00221299
Cyclopentanecarboxaldehyde	1.59467	1.34035	1.84899	5.34584e-07	1.95329e-05
2-Propenoic acid, ethyl ester	1.59303	1.27165	1.91441	0.000227773	0.00248148
Heptanoic acid, ethyl ester	1.59274	1.16446	2.02101	0.000182661	0.00208567
Furan	1.59154	1.45137	1.7317	5.94663e-07	2.10795e-05
Benzene, propyl-	1.59072	1.24794	1.93349	6.79426e-05	0.000932738
Benzhydrazide, 2-benzoyl-N2-(4-methoxybenzoyl)-	1.58861	1.3757	1.80152	4.25512e-06	9.62467e-05
1-Hexanone, 1-(2-pyridinyl)-	1.58855	1.38474	1.79236	4.06018e-06	9.42466e-05
(Z)-Undec-6-en-2-one	1.58725	1.31882	1.85568	9.10398e-06	0.000188017
1-Undecene	1.58677	1.33464	1.83889	3.29263e-05	0.000504516
Ethyl 9-decenoate	1.58264	1.42791	1.73737	2.69923e-06	7.36859e-05
Methane, diethoxy-	1.58236	1.42526	1.73946	2.67911e-06	7.36859e-05
Octanoic acid, 2-butyl-	1.58229	1.09398	2.0706	7.91324e-05	0.00105584
1,7-Dimethyl-4-(1-methylethyl)cyclodecane	1.57906	1.26161	1.89651	1.29757e-05	0.000221707
2,4,4-Trimethyl-3-(3-methylbutyl)cyclohex-2-enone	1.57872	1.0896	2.06784	0.000111054	0.00139551
Propanal, 2-methyl-	1.57521	1.18323	1.9672	1.13135e-06	3.57504e-05
3-Cyclohexene-1-carboxaldehyde	1.57315	1.34894	1.79737	3.66053e-06	8.96263e-05
Nonanal	1.57308	1.4598	1.68636	1.43171e-06	4.19791e-05
Propanoic acid, 2-methyl-	1.57242	1.182	1.96284	0.000180649	0.00207266
Ethyl-2-benzofuran	1.56314	1.38302	1.74325	6.33765e-06	0.000136836
1-Pentanethiol	1.56226	1.17774	1.94679	0.000264439	0.00276671
Furan, 2-(1-pentenyl)-, (E)-	1.56043	1.19066	1.9302	1.45399e-05	0.00024491
Hexanoic acid, 3-hydroxy-, ethyl ester	1.5601	1.02131	2.0989	2.39961e-06	6.7846e-05
1-Octanol, 2-butyl-	1.55916	1.34401	1.77431	3.97789e-06	9.42466e-05
Cyclohexane, 1,1,2-trimethyl-3,5-bis(1-methylethenyl)-, (2a,3a,5beta)-	1.55338	1.05217	2.05458	3.24515e-06	8.37743e-05
3-Tetradecyn-1-ol	1.54635	1.08001	2.01269	1.27781e-05	0.000219914
Butanoic acid, 2-ethyl-, butyl ester	1.54579	1.02647	2.06512	4.0763e-06	9.42466e-05
2,6,10,10-Tetramethyl-1-oxaspiro[4.5]decan-6-ol	1.54563	1.02762	2.06364	3.39376e-06	8.57467e-05
Ethyl formate	1.54132	1.11447	1.96816	0.000338794	0.00338083
Acetic acid, 2-(4-methyl-2-thiazolyl)-, ethyl ester	1.54026	1.02335	2.05717	0.00023072	0.00249073
Methoxyacetic acid, hexyl ester	1.53876	1.16414	1.91338	0.000494505	0.00422464
1-Butanamine, N-(1-propylbutylidene)-	1.53832	1.04323	2.03342	0.000102333	0.00131373
trans-2-Dodecenoic acid	1.5378	1.15272	1.92287	4.89213e-06	0.000109611
3-Heptyne, 5-methyl-	1.53634	1.1931	1.87959	0.000353298	0.00351081
Methyl anthranilate	1.53606	1.12928	1.94283	7.21846e-05	0.000979648
3-Ethylcyclopentanone	1.53447	1.1149	1.95405	0.000334758	0.00335674
n-Decanoic acid	1.53328	1.15298	1.91357	0.000261563	0.00276095
Benzene, (methoxymethyl)-	1.52967	1.08439	1.97495	5.10174e-06	0.000113239
Pentane, 1-(methylthio)-	1.52953	1.36653	1.69252	2.94332e-05	0.00046294
2-Hydroxyethyl isobutyl sulfide	1.52873	1.10077	1.95668	5.86074e-05	0.000828528
1,3-Dioxane-5-methanol, 5-ethyl-	1.52785	1.01414	2.04156	0.000401295	0.00371549
3-Dodecylcyclohexanone	1.52428	1.01123	2.03732	0.000405133	0.00371549
2-Pentanone, 3-methyl-	1.51644	1.0867	1.94619	7.97261e-06	0.000169062
Cyclopentene, 5-hexyl-3,3-dimethyl-	1.51026	1.04227	1.97825	0.000674913	0.0055273
Acetic acid, octyl ester	1.50944	1.14991	1.86898	6.16929e-05	0.000866986
3-Methyl-1-dodecyn-3-ol	1.50753	1.02684	1.98822	9.82733e-06	0.000190511
Phenol, 4-(3-methyl-2-butenyl)-	1.50693	1.02394	1.98992	9.98036e-06	0.000190511
Methyl pentyl disulfide	1.50553	1.10766	1.90341	1.02277e-05	0.000190642
2-Methyl-2-nonanol	1.50526	1.01702	1.99349	9.93224e-06	0.000190511
1-Pentadecene	1.50483	1.34899	1.66066	0.000501828	0.00425657
2-Hydroxy-3-hexanone	1.50448	1.01346	1.9955	1.01245e-05	0.000190642
1-Heptene, 2-pentyl-	1.50414	1.02759	1.98068	1.02746e-05	0.000190642
Methyl 8-(2-furyl)octanoate	1.50239	1.01457	1.99021	0.000156182	0.00186398
1-Butanol, 3-methyl-, acetate	1.50229	1.02065	1.98394	3.01446e-05	0.00046793
Furfural	1.50125	1.30186	1.70065	0.000689817	0.00562995
Nonanohydrazide	1.49518	1.03137	1.95899	2.7966e-05	0.000442795
1H-Inden-1-ol, 2,3-dihydro-2-methyl-	1.49433	1.08984	1.89883	1.35111e-05	0.000229206
Hexanal, 2-ethyl-	1.49144	1.2881	1.69478	0.000100103	0.00129915
Methyleugenol	1.49069	1.10444	1.87695	1.60664e-05	0.000266837
Ether, tert-butyl isopropylidenecyclopropyl	1.4903	1.18816	1.79244	1.74498e-05	0.000285815
Butanedioic acid, diethyl ester	1.48674	1.07073	1.90274	0.00103345	0.00790757
2-Hepten-3-ol, 4,5-dimethyl-	1.48308	1.03062	1.93553	0.000394511	0.00371549
Caprolactam	1.47981	1.19156	1.76806	0.000124793	0.00155174
Ethyl methanesulfinate	1.47968	1.08666	1.87271	8.85322e-05	0.00116168
1,3-Octadiene	1.47641	1.1317	1.82111	0.000544449	0.00455305
Octanal	1.4763	1.29258	1.66001	2.08662e-05	0.000337124
Decanoic acid, ethyl ester	1.47446	1.10861	1.84031	0.00017624	0.0020418
Hexanal	1.47134	1.12033	1.82235	3.0142e-05	0.00046793
1,3-Nonadiene, (E)-	1.47096	1.03283	1.90908	0.000949938	0.00739706
Pyridine, 2-(1-methylethyl)-	1.47016	1.28838	1.65193	7.41363e-05	0.000994767
Cyclohexanepropanol, 2,2-dimethyl-6-methylene-	1.46999	1.02123	1.91876	0.000135027	0.00165304
Disulfide, dimethyl	1.46875	1.24276	1.69473	3.196e-05	0.00049289
Hexane, 1-(1-ethoxyethoxy)-	1.46675	1.03266	1.90085	0.000157853	0.0018745
1,8(2H,5H)-Naphthalenedione, hexahydro-8a-methyl-, cis-	1.46615	1.0619	1.8704	5.51665e-05	0.00078928
1-Decene	1.46578	1.05123	1.88033	5.10244e-05	0.000738921
1,3,6,10-Dodecatetraene, 3,7,11-trimethyl-, (Z,E)-	1.46255	1.05193	1.87317	0.000148716	0.00178384
1-Propanol	1.45863	1.09249	1.82477	0.0003687	0.00361534
Pentane, 1,1'-thiobis-	1.45787	1.03635	1.87939	0.0001301	0.00160097
8-Hexadecyne	1.45424	1.01078	1.89769	0.000980923	0.00756393
Thiophene, 2-hexyl-	1.44714	1.05997	1.8343	5.0184e-05	0.000735681
Furan, tetrahydro-2,2-dimethyl-5-(1-methylpropyl)-	1.44588	1.14297	1.7488	4.80543e-05	0.000708876
Furan, 2-propyl-	1.44412	1.11317	1.77507	0.000126638	0.00156648
Heptadecane	1.44306	1.10904	1.77709	0.00197207	0.0137732
(E)-9-Octadecenoic acid ethyl ester	1.44202	1.11694	1.7671	0.000202865	0.00225143
2,4-Decadien-1-ol	1.43952	1.12865	1.75039	0.000715698	0.00572317
Heptadecanoic acid, ethyl ester	1.43951	1.05063	1.82839	0.00199178	0.0137915
Benzene, 1-heptenyl-	1.43872	1.10559	1.77184	0.00132636	0.00975265
Acetic acid, heptyl ester	1.4363	1.01724	1.85537	0.00104546	0.00790757
1-Pentene, 3-ethyl-2-methyl-	1.43243	1.03478	1.83009	0.000226809	0.00248148
Ethyl 2-hydroxy-3-phenylpropanoate	1.42929	1.01766	1.84092	0.0012814	0.00948074
Octadecanoic acid, ethyl ester	1.42843	1.1081	1.74876	0.000369907	0.00361534
Pyridine, 2-hexyl-	1.42818	1.1079	1.74846	0.00016368	0.00192723
Decanal	1.42788	1.11145	1.74431	8.13665e-05	0.00107958
9-Octadecene, 1,1-dimethoxy-, (Z)-	1.42446	1.04549	1.80343	0.000218827	0.00240608
Ethyl tiglate	1.42148	1.04472	1.79824	0.000109568	0.0013907
Methional	1.41997	1.13457	1.70537	0.000102326	0.00131373
2-Penten-1-ol, (E)-	1.4167	1.06832	1.76507	8.84191e-05	0.00116168
Dodecanal	1.41053	1.09645	1.72462	0.000175244	0.00204022
Benzene, pentyl-	1.40187	1.13905	1.66469	0.0019095	0.0134571
Phenol, 2-(2-methyl-2-propenyl)-	1.39823	1.02704	1.76943	0.000171996	0.00201227
cis-5-Dodecenoic acid	1.38124	1.09918	1.6633	0.00257952	0.0170216
Undecanal	1.3793	1.07987	1.67873	0.000299356	0.00307825
1H-Indene, 2,3-dihydro-1,1,5,6-tetramethyl-	1.37226	1.00053	1.74399	0.00069874	0.00566385
1,3,5-Trifluorobenzene	1.37077	1.01078	1.73075	0.00348137	0.02131
4-Methoxy-5H-furan-2-one	1.36116	1.06668	1.65563	0.000769872	0.00613572
1-Ethyl-5-methylcyclopentene	1.36039	1.08073	1.64005	0.000308569	0.00314529
Heptanal	1.34796	1.01786	1.67806	0.000661266	0.00543428
Oxirane, pentyl-	1.3256	1.01654	1.63466	0.00220499	0.0150053
Butanoic acid, 3-methyl-, hexyl ester	1.32427	1.00686	1.64167	0.00156916	0.011362
9-Octadecynoic acid	1.31741	1.13936	1.49546	0.00576962	0.0268683
Pyrazine	1.28196	1.08418	1.47974	0.00104024	0.00790757
