# Supplementary material
Source: Research Square preprint supplement (doi:10.21203/rs.3.rs-9128298/v1)
Supplement: Supplementary file 2 [file 322bb92240e2ea9222c1da78.xlsx]

## Sheet: Overview
name	CAS	RangeofOdorMin	RangeofOdorMax	OdorCharacter	Day0_ROAV	Day2_ROAV	Day4_ROAV	Day6_ROAV	Day8_ROAV	Day10_ROAV
Styrene	100-42-5	2.8	61000	sharp, sweet	0.000869471	3.50759e-05	0.000296138	0.000176219	0.000383042	8.2537e-05
Benzyl alcohol	100-51-6	40927.2		Floral, Fruity, Sweet, Estery	1.45632e-06	1.3088e-06	2.75959e-06	2.01698e-06	5.1908e-07	5.46918e-07
Benzaldehyde	100-52-7	1.5	783000	bitter almond, fruity,vanilla	0	0	0	0	0.000124708	0
Aniline, N-methyl-	100-61-8	1600	2000		0	0	0	3.68349e-07	0	0
Pentanoic acid, 2-hydroxy-4-methyl-, ethyl ester	10348-47-7	126		Blackberry	0	4.36257e-05	0.000145114	0.000112433	1.30075e-05	2.74915e-05
2(3H)-Furanone, 5-butyldihydro-	104-50-7	7		Fruity, Peach, Creamy And Sweet With A Fatty Nuance	0	6.63381e-06	0	0	0	1.02662e-05
2(3H)-Furanone, 5-heptyldihydro-	104-67-6	4.2			0	7.42401e-05	0.00106922	0.000503714	0.000222277	0.000493688
1-Hexanol, 2-ethyl-	104-76-7	0.198		Rose, Green	0.333296	0.172022	0.238886	0.676475	0.0374258	0.280242
2(3H)-Furanone, dihydro-5-propyl-	105-21-5	1000		Sweet	0	0	0	0	0	3.9095e-07
Propanoic acid, ethyl ester	105-37-3	19019.3		Ruity, Banana-Flavor	7.05861e-08	7.97171e-08	2.92621e-06	6.41852e-07	5.9994e-08	3.46325e-07
Butanoic acid, ethyl ester	105-54-4	9.5		Fruity	4.52254e-05	0.00126781	0.00356621	0.00128652	0.000113941	0.000466303
Ethane, 1,1-diethoxy-	105-57-7	719		Fruity	2.2378e-06	5.99743e-06	3.96414e-06	1.56941e-06	9.66521e-06	9.85073e-06
Caprolactam	105-60-2	65		mild	6.95132e-06	1.23797e-05	9.25482e-05	4.81029e-05	2.37373e-05	1.96796e-05
Butanoic acid, propyl ester	105-66-8	160		Fruity, Floral	0	0	7.50012e-06	0	0	0
Hexanoic acid, 2-methylpropyl ester	105-79-3	5250		Fruity	0	7.2205e-08	1.17593e-07	1.20156e-07	9.61075e-08	2.66935e-07
Citronellol	106-22-9	100		Floral, Rose, Lime	0	3.24017e-05	2.74354e-05	7.26073e-05	0	1.49907e-05
Butanoic acid, 3-methylbutyl ester	106-27-4	915		Floral, Fruity	0	0	2.10221e-08	3.72053e-08	0	0
Heptanoic acid, ethyl ester	106-30-9	13153.2		Fruity	5.52252e-07	2.50065e-06	4.42504e-06	2.12279e-06	2.75888e-06	5.24471e-06
Octanoic acid, ethyl ester	106-32-1	147		Fruity	0.000457136	0.00116639	0.00197576	0.00159213	0.00043752	0.000704836
Dodecanoic acid, ethyl ester	106-33-2	500		Sweet, Waxy, Floral	3.21516e-05	0.000237945	0.000592873	0.000247667	7.55888e-05	0.000229558
p-Cresol	106-44-5	60			0	0	0.000462059	0.00019993	0	3.86128e-05
Benzene, 1,4-dichloro-	106-46-7	121	15000	camphor, mothballs	0	0	7.28192e-05	1.66891e-05	5.49007e-05	2.07962e-05
p-Aminotoluene	106-49-0	27	3200	amine,empyreumatic	0	2.08712e-05	0	0	4.83638e-05	1.72913e-05
Hexanoic acid, methyl ester	106-70-7	87		Floral, Fruity	7.35219e-06	8.39326e-06	1.1637e-05	7.37027e-06	7.96748e-06	9.11405e-06
2-Propenal	107-02-8	3.6	1800	pungent	0.00192073	0.00372272	0.000564578	0.000702852	0.00233082	0.00462382
Ethane, 1,2-dichloro-	107-06-2	4300	988000	sweet	5.08156e-10	1.85096e-09	0	0	1.86237e-09	3.13937e-09
2-Propen-1-ol	107-18-6	510	35000	mustard	6.91142e-08	0	0	0	0	0
Pentane, 2-methyl-	107-83-5	426	20000	gasoline	6.98065e-08	1.35663e-07	4.45316e-06	0	1.01665e-07	4.33397e-08
2-Pentanone	107-87-9	28	65000	fingernail polish	2.34662e-05	0	0	6.27151e-07	0	0
2-Propanol, 1-methoxy-	107-98-2	8390	33000	etherish, ammonia	1.2939e-07	3.83414e-07	0	1.14585e-07	1.32893e-07	9.25971e-08
2-Pentanol, 4-methyl-	108-11-2	335	526		0	1.1591e-08	7.57164e-09	6.85053e-08	1.64148e-08	5.41221e-10
Acetic anhydride	108-24-7	120	360	sour, acid	0	0	5.14044e-06	0	0	0
Maleic anhydride	108-31-6	250	320	acrid	3.45127e-07	1.37007e-06	4.61615e-06	2.07309e-06	9.89037e-07	2.66876e-06
Phenol, 3-methyl-	108-39-4	20		Smoky,Petroleum-Like	0	3.52517e-05	0	0	0	0
Benzenamine, 3-methyl-	108-44-1	460	5900	empyreumatic	0	9.4079e-07	0	0	0	0
Pyrazine, 2,6-dimethyl-	108-50-9	790.79		Green Pepper Fragrant	3.79982e-07	6.29524e-07	1.16655e-06	6.09132e-07	9.73756e-08	8.14313e-08
Butanoic acid, 3-methyl-, ethyl ester	108-64-5	6.89		Fruity, Apple-Flavor	0	1.83625e-06	0.000121842	0.000152371	2.47189e-06	1.04881e-05
Cyclohexanol	108-93-0	58	491	camphorous	7.19202e-07	1.86639e-05	2.22308e-05	3.16787e-05	1.13898e-05	1.76326e-05
Cyclohexanone	108-94-1	52	219000	sweet, sharp	8.45383e-06	2.23342e-05	7.83266e-06	2.08238e-05	2.25737e-05	2.48876e-05
Phenol	108-95-2	4.5	1950	medicinal, acid,ink, creosote,empyreumatic	0.000189724	0.0173516	0.0437435	0.031828	0.00286546	0.0149377
Pyridine, 2-methyl-	109-06-8	2.6	23.6	strong, unpleasant	0.00073221	0	0	0	4.43387e-05	5.15711e-05
Pyrazine, methyl-	109-08-0	121927		Toasted Bread, Roasted Almonds, Fried Peanuts	5.33948e-09	1.99611e-08	1.26044e-08	1.22051e-08	4.5046e-09	1.05206e-08
Pentanoic acid	109-52-4	389.11		Pit Mud Smell, Sweat Smell, Sour Smell	7.32114e-06	5.92084e-06	5.07971e-05	7.71421e-05	8.02055e-05	8.17593e-05
n-Propyl acetate	109-60-4	48	87000	sweet, ester	0	1.70439e-06	0.000436299	0.000420855	0	4.32235e-06
Ethyl formate	109-94-4	2700	30000	aromatic	2.00452e-06	4.55322e-06	3.78143e-06	7.49857e-06	2.82069e-06	9.04233e-06
Furan	110-00-9	10060		strong	4.44462e-06	5.51691e-06	4.06378e-07	1.71659e-06	6.45956e-06	4.71724e-06
Thiophene	110-02-1	511		Garlic, Alliaceous	2.67829e-07	3.00992e-07	3.57563e-07	2.67166e-07	1.96935e-07	1.22233e-07
2-Hexanone, 5-methyl-	110-12-3	2.1	135	sweet, sharp	0	0	0	0	2.13225e-07	0
Isobutyl acetate	110-19-0	8	129000	sweet, ester,medicinal	0	0	0.000172912	0.000290856	9.3454e-06	5.61521e-06
Decanoic acid, ethyl ester	110-38-3	420		Brandy	1.74344e-05	7.40872e-05	0.000277293	0.000140544	3.55289e-05	0.000119663
2-Heptanone	110-43-0	0.75	710	sweet, mushroom	0.0341347	0.000630765	0.0320549	0	0.0401028	0.0114759
Ethanol, 2-methoxy-, acetate	110-49-6	330	640	sweet, ester	0	0	0	0	4.1718e-07	0
n-Hexane	110-54-3	1500	248000	gasoline	9.26173e-09	6.43774e-08	3.13904e-08	0	0	0
Pentanal	110-62-3	0.4	4970	sickening, rancid,decayed	0.149767	0.0976059	0.0785162	0.0750327	0.0567158	0.103084
Cyclohexane	110-82-7	520	784000	pungent	1.08977e-08	2.86423e-08	5.57079e-08	4.97123e-08	3.80777e-08	6.82951e-08
Pyridine	110-86-1	10	12000	burnt, pungent,nauseating	0.0179598	0.00937508	0.00723347	0.0158172	0.00781716	0.0140527
5-Hepten-2-one, 6-methyl-	110-93-0	50		Herby, Green, Citrus, Musty, Lemongrass	7.98618e-05	0.000138306	9.43409e-05	0.00011131	8.85188e-05	0.000126825
Octanoic acid, methyl ester	111-11-5	200		Fruity, Citrus-Like	1.27893e-07	1.73701e-06	1.11101e-06	2.79616e-07	1.67549e-06	2.32047e-06
Heptanoic acid	111-14-8	13821.3		Sour, Sweaty, Muddy, Musty	7.1074e-07	2.46894e-06	2.72331e-06	3.27276e-06	2.67206e-06	9.09828e-07
1-Hexanol	111-27-3	2.4	16000	green grass, plastic	0.0705034	0.145593	0.159245	0.134837	0.0663096	0.116391
Glutaraldehyde	111-30-8	0.37	39		0.00012655	0.000599327	0	0.000279721	0	0.000820598
1-Hexanethiol	111-31-9	0.39		Baked Taste	0	5.88535e-05	0.000395971	0.000235433	0	0.000403421
Octane	111-65-9	660	235000	gasoline, oil	7.92033e-07	2.89837e-06	9.3388e-06	9.34598e-06	2.10435e-06	7.65889e-06
1-Octene	111-66-0	1	206000		0.00126925	0.00063404	0.000490234	0.000326878	0.0003444	0.000531736
1-Heptanol	111-70-6	3		Grassy	0.00255071	0.0151073	0.0198379	0.0168568	0.00883446	0.0202572
Heptanal	111-71-7	0.003		Citrus, Fatty, Rancid	7.67567	6.74372	3.89299	10.0846	10.5916	10.3892
Nonane	111-84-2	2300	21000	gasoline	2.80398e-07	1.40459e-06	5.66394e-06	4.63859e-06	9.34608e-07	4.5682e-06
1-Octanol	111-87-5	0.9	1690	penetrating	0.109653	0.0906283	0.0584403	0.0795002	0.0267352	0.0747127
6-Octen-1-ol, 3,7-dimethyl-, (R)-	1117-61-9	25		Powerful, Fresh, Herbaceous-Citrus	0	7.15169e-05	0.000305154	0	0	0
Nonanoic acid	112-05-0	3559.23		Fat Smell	5.66281e-06	9.68449e-06	1.20369e-05	7.24902e-06	6.58417e-06	1.05304e-05
2-Undecanone	112-12-9	0.004355		Orange, Fresh, Green	34.6784	29.6561	73.2099	60.4654	19.1997	36.5587
Pyrazine, tetramethyl-	1124-11-4	80073.2		Sweet, Fruity, Floral, Peach	2.88507e-07	1.09898e-07	2.01273e-07	1.33461e-07	5.14168e-08	1.21008e-07
Propene	115-07-1	10100	99000	gassy, aromatic	8.61607e-06	0	1.7631e-08	8.72959e-09	0	0
Butanoic acid, 2-methyl-	116-53-0	5931.55		Sweat Odor, Sour Odor, Pit Mud Odor	0	0	5.17673e-07	0	0	0
Ethanone, 1-(2-furanyl)-	1192-62-7	58504.2		Almond, Sweet, Creamy	0	0	0	1.03633e-09	0	4.83202e-10
2-Acetyl-5-methylfuran	1193-79-9	40870.1		Biscuits, Toasted Almonds, Soap	0	0	0	5.97961e-08	1.76609e-09	4.02741e-10
Phenol, 2,4-dichloro-	120-83-2	0.041		medicinal, phenolic,leather-like, fishsauce	0	0	0	0.00473299	0.0151433	0
Trimethyl phosphite	121-45-9	0.099		pungent	0	0	0.00381248	0	0	0
Benzeneacetaldehyde	122-78-1	1		Floral, Honey	0.0762226	0.104801	0.124956	0.183793	0.0838368	0.0992718
Phenol, 4-ethyl-	123-07-9	440		Phenolic, Leather	2.0195e-07	4.72475e-07	1.11303e-06	4.28682e-07	9.73175e-07	7.98517e-07
Butanedioic acid, diethyl ester	123-25-1	353000		Fruity, Sweet	0	3.26961e-08	8.29182e-08	8.13069e-08	9.02044e-08	1.21481e-07
Nonanoic acid, ethyl ester	123-29-5	3150.61		Floral, Fruity	8.74584e-06	8.17823e-06	1.21812e-05	5.9211e-06	7.14021e-06	1.21456e-05
Pyrazine, 2,5-dimethyl-	123-32-0	3201.9		Green Grass, Fried Bean Spice	5.90442e-08	1.3779e-07	3.71592e-07	2.49664e-07	0	5.38564e-08
beta-Myrcene	123-35-3	773		Geranium	3.31887e-07	1.63936e-06	3.94101e-06	6.05002e-06	8.15904e-07	1.91994e-06
Propanal	123-38-6	1	101000	fruity	0.00010023	0	0	0.00019079	0.00039009	0
1-Butanol, 3-methyl-	123-51-3	1.69	1750	sweet, malty, rancid,rubber,	0.0243672	0.0290932	0.121634	0.162759	0.01408	0.0370631
Hexanoic acid, ethyl ester	123-66-0	30		Fruity, Green Apple	0.00118215	0.00193642	0.00577959	0.00456877	0.00320003	0.00293846
Butanal	123-72-8	0.3	5090	pungent	0.0213741	0.0265413	0.0231604	0.0169318	0.0388589	0.0238574
1-Butanol, 3-methyl-, acetate	123-92-2	245		Banana-Like	0	1.06374e-06	3.36181e-05	8.29185e-05	2.30038e-07	5.29299e-06
2-Propen-1-amine, N-2-propenyl-	124-02-7	2000		disagreeable	0	0	0	0	0	1.04931e-06
Tetradecanoic acid, ethyl ester	124-06-1	500		Sweet, Waxy	0.000396153	0.000295472	0.00107833	0.000428846	0.000147879	0.000755878
Octanoic acid	124-07-2	500		Rancid, Cheese, Fatty Acid	0.000118055	0.000328183	0.00055778	0.000220396	0.000178605	0.000690229
Octanal	124-13-0	2.5		Lemon, Citrus, Green Grass	0.0184637	0.00795359	0.00200066	0.00514754	0.0159407	0.00904633
Nonanal	124-19-6	1		Aldehyde, Citrus, Orange Peel	0.0939927	0.0516015	0.00779322	0.0225398	0.0450799	0.0521834
Carbon dioxide	124-38-9	39000000	600136000		6.03854e-11	0	0	8.15121e-11	6.59306e-12	5.02509e-11
Furan, 2-methyl-5-(methylthio)-	13678-59-6	211		Mustard, Onion	0	6.49382e-07	2.99963e-07	3.56232e-07	1.58249e-07	2.52511e-07
5-Methyl-2-thiophenecarboxaldehyde	13679-70-4	275		Cherry, Swee	0	0	0	2.61975e-07	0	7.44526e-07
1-Butanol, 2-methyl-	137-32-6	0.25		Wine, Onion, Malt	0	0.147786	0.217957	0.166012	0	0.0283964
Limonene	138-86-3	1.8	310	lemon, plastic, citrus,rubber, terpeny	0.000232722	0.000813359	0.00030796	0	0.000631649	0
Pyrazine, ethyl-	13925-00-3	21814.6		Fried Sesame Seeds, Fried Peanuts, Fried Noodles	2.04437e-09	1.12199e-08	6.5797e-09	6.60571e-09	2.59405e-09	6.46291e-09
2-Propenoic acid, ethyl ester	140-88-5	0.0066	3.2	sweet,ester,plastic, alcohol, sharp,ammoniacal	0.0187225	0.103874	0.10909	0.292877	0.111817	0.284351
Ethyl Acetate	141-78-6	90	190000	fruity, sweet,fingernail polish,etherous	0.000168053	0.000841346	0.000806856	0.00171397	0.000237105	0.000707488
Hexanoic acid	142-62-1	3000		Roses, Geraniumc	1.75959e-05	5.50469e-05	0.000102469	3.58421e-05	2.94067e-05	7.67708e-05
Heptane	142-82-5	410	732000	gasoline	4.4302e-07	7.99726e-07	3.78413e-06	3.72611e-06	1.51554e-06	2.40462e-06
Acetic acid, hexyl ester	142-92-7	5560		Fruity, Floral	1.16595e-06	1.10871e-05	1.70928e-05	9.49163e-06	3.12173e-06	8.88664e-06
Dodecanoic acid	143-07-7	9153.79		Greasy, Slightly, Pine, Wood	3.42261e-07	2.38116e-06	2.97833e-06	1.87531e-06	1.71964e-06	2.57712e-06
Pyrazine, trimethyl-	14667-55-1	0.023		Roasted Nuts, Cocoa, Peanuts	0.0155306	0.0205656	0.0383933	0.0302132	0.00463543	0.00548711
3-Buten-2-one, 4-(2,6,6-trimethyl-1-cyclohexen-1-yl)-	14901-07-6	8.4		Flowery, Violet-Like	3.85871e-06	0	0	0	3.91528e-05	0
2H-Pyran, tetrahydro-4-methyl-2-(2-methyl-1-propenyl)-	16409-43-1	0.5		Sweet Floral Aroma, Such As Roses &Amp; Nuances Of Fresh Bay Leaves	0	0	0	0.000153058	0	0
Thiazole, 5-ethenyl-4-methyl-	1759-28-0	118.55		Cocoa, Roast, Soil	0	0	1.1552e-06	2.32381e-06	0	3.76247e-07
Thiophene, 3-ethyl-	1795-01-3	200.4			0	0	1.28446e-06	1.33062e-06	0	0
2-Nonenal, (E)-	18829-56-6	0.0002		Fatty, Cucumber	100	100	99.1209	100	90.3928	100
Pentaborane(9)	19624-22-7	970		pungent	7.63447e-08	2.17971e-08	0	1.65271e-08	8.57906e-09	2.08152e-08
Benzenepropanoic acid, ethyl ester	2021-28-5	130		Floral, Rosy-Flavor, Fruity	0	2.27167e-05	0.000466241	0.000744384	0.000248927	0.000404982
2-Dodecenal, (E)-	20407-84-5	0.00053		Green, Fatty, Sweet	0.370865	2.06214	0	0	1.81306	3.71781
Isopentyl hexanoate	2198-61-0	1400		Grassy	1.70869e-07	5.62628e-06	1.27651e-05	1.68568e-05	2.83332e-06	1.14728e-05
gamma-Dodecalactone	2305-05-7	7		Slight Coconut, Fruity	0.000604023	0.00265517	0.00649563	0.00359144	0.00186242	0.00190473
Pyrazine, 2-methoxy-3-(1-methylpropyl)-	24168-70-5	0.015			0.101014	0.116382	0.274303	0.215403	0.0371726	0.101395
Pyrazine, 2-methoxy-3-(2-methylpropyl)-	24683-00-9	0.002			0	0	0	0	0	0.0656928
2,4-Decadienal, (E,E)-	25152-84-5	2.9		Dusty, Waxy, Oily, Soapy	0.0521786	0.0096216	0.0607154	0.0496318	0.0169567	0.0391769
Pentanoic acid, 4-methyl-, ethyl ester	25415-67-2	6		Fruity	0	1.75219e-06	3.11845e-06	8.32836e-06	0	9.32605e-06
2-Octenal, (E)-	2548-87-0	0.003		Nuts, Green, Fatty	29.7783	28.1579	15.1858	23.4374	21.7165	33.0166
Pyrazine, 2-methoxy-3-(1-methylethyl)-	25773-40-4	0.015		String-Bean, Pea, Earthy, Chocolate, Nutty	0.0133867	0.0177591	0.0446368	0.0995589	0.0021026	0.051447
4-Vinylphenol	2628-17-3	180		Chemical, Woody	0	0.000120642	9.77398e-05	0.000185726	0	0
Butanoic acid, hexyl ester	2639-63-6	8620		Fruity, Floral	0	2.67418e-07	6.65764e-07	1.55399e-07	2.46806e-08	9.71916e-08
2-Methyl-3-furanthiol	28588-74-1	0.0057		Beefy, Vitamin,Sulfur	0	0	0.0731323	0.013102	0	0
Thiazole	288-47-1	740		Nut, Sulfur, Stink	6.78419e-07	5.87879e-07	2.72063e-07	9.38451e-07	1.91936e-06	2.17068e-06
Furan, 2-ethyl-	3208-16-0	2.3		Burnt,Sweet,Coffee-Like	0.00123791	0.00129924	0.000963114	0.000614718	0.00166344	0.00152934
Methional	3268-49-3	7.12		Cooked Potato	0.00253507	0.00726595	0.000967204	0.00360095	0.0027109	0.00705219
n-Decanoic acid	334-48-5	15000		Fatty, Rancid, Soap	1.82726e-07	1.20045e-06	3.52332e-06	1.92434e-06	1.08248e-06	1.54814e-06
1-Octen-3-ol	3391-86-4	11		Mushroom	0.00932854	0.00828684	0.00577908	0.00588647	0.0012921	0.00409438
Dimethyl trisulfide	3658-80-8	0.36		Sulfurous,Onion, Spicy	0.00061039	0.00196248	0.00308923	0.00276501	0.000418098	0.00188377
Furan, 2-pentyl-	3777-69-3	0.006		Green Beans, Vegetable	17.4037	16.0365	34.7756	24.4823	14.6667	12.0494
2(3H)-Furanone, 5-butyldihydro-4-methyl-	39212-23-2	67		Woody, Oaky	0	0	3.37439e-05	0	0	1.19107e-05
2-Butenal	4170-30-3	20	590	pungent	0	0	2.16878e-06	0	0	0
2,3-Butanedione	431-03-8	0.002	2900	pleasant, buttery	16.4388	35.0436	30.4412	19.4748	15.5399	12.9091
1-Octen-3-one	4312-99-6	0.005		Mushroom-Like	10.3661	4.16402	10.4581	8.26531	6.32489	8.17292
2,6,10-Dodecatrien-1-ol, 3,7,11-trimethyl-	4602-84-0	20			0	0.000286917	0.000412503	0.000454422	0.000154006	0.000140343
Thiophene, 2-pentyl-	4861-58-9	287		Fruity, Sweet	6.97839e-06	0	0	0	3.52119e-06	0
Butanoic acid, 3-methyl-	503-74-2	0.02		Rancid Cheese, Sweaty, Putrid	0.11144	0.433207	2.26529	2.27448	0.786778	2.91781
1-Propanol, 3-(methylthio)-	505-10-2	1000		Cabbage, Cooked Potato, Garlic	5.86089e-06	2.34161e-05	3.80686e-05	4.08883e-05	3.48947e-06	2.20285e-05
2,3-Butanediol	513-85-9	4.5		Fruity, Onion	0	0	0.000100218	0	0	0
Acetophenone, 2-chloro-	532-27-4	16	111	fruity	0	1.64452e-06	0	0	0	0
2-Undecenal, E-	53448-07-0	0.0004		Fatty, Waxy, Rose, Citrus	0	0	0	0	25	0
Pentanoic acid, ethyl ester	539-82-2	26.78		Fruity, Apple-Flavor	5.24044e-05	0.000346998	0.00068459	0.000538192	0.000437158	0.000728044
3-Heptanone, 5-methyl-	541-85-5	5900		solvent, sharp	1.87403e-06	0	0	0	0	3.92203e-07
1,3-Cyclopentadiene	542-92-7	1800		terpene-like,pine, fruity	0	0	5.39302e-08	7.4104e-08	6.41877e-08	2.7676e-08
2-Heptanol	543-49-7	200		Fruity, Mouldy, Musty, Mushroom	5.11742e-06	1.20049e-05	3.65947e-05	4.7306e-05	1.3022e-05	2.8827e-05
2-Butanone, 3-methyl-	563-80-4	510	4800	sweet, sharp	3.72884e-05	5.98582e-05	0	0.000117106	3.02389e-05	0
Allyl Isothiocyanate	57-06-7	9.1	1970	irritating	2.71281e-06	0	0	0	0	3.65359e-06
Cyclohexanone, 2-methyl-	583-60-8	181		acetone	3.4042e-06	1.88183e-05	6.51889e-05	3.21529e-05	3.8783e-06	9.66983e-06
Butanal, 3-methyl-	590-86-3	16.51		Floral, Fruity	0.00134512	0.00206398	0.00185041	0.00182017	0.00087891	0.0023767
Phenylethyl Alcohol	60-12-8	2600		Floral	9.31309e-06	8.85341e-06	3.23883e-05	7.59853e-05	3.56848e-06	1.40971e-05
Hydrazine, methyl-	60-34-4	1000	3000	ammonia	0	0	5.6359e-08	0	0	0
Thiophene, 3-methyl-	616-44-4	360		Plastic, Sulfurous	2.14448e-08	1.17314e-07	1.59196e-07	2.19552e-07	3.84932e-08	8.29813e-08
Aniline	62-53-3	12	10000	pungent, oily,empyreumatic	4.601e-06	0	6.19641e-06	2.41294e-05	0	0
2-Furancarboxaldehyde, 5-methyl-	620-02-0	2000		Sweet, Caramelic, Bready, Brown, Coffee-Like	0	0	0	0	0	4.1972e-09
1-Butanol, 2-methyl-, acetate	624-41-9	26	39		0	0	1.36028e-05	0	5.65011e-06	2.4447e-06
Methane, isocyanato-	624-83-9	2140			2.26964e-07	1.6782e-06	0	0	3.32404e-08	6.12122e-08
Disulfide, dimethyl	624-92-0	0.29	1450	garlic, putrid,asparagus	0	3.64099e-05	0.000299027	0.00289746	0	4.14511e-05
Hexanoic acid, propyl ester	626-77-7	12800		Fruity, Pineapple-Flavor	1.36721e-08	2.9273e-08	7.89979e-07	2.12204e-07	7.73504e-08	1.16234e-07
Acetic acid, pentyl ester	628-63-7	7	43000	banana, etherous	0.000387843	0.000512446	0.00120036	0.00354778	0.000230519	0.00129417
Hexadecanoic acid, ethyl ester	628-97-7	2		Wax	0.203684	0.126568	0.560705	0.431372	0.099053	0.327358
2-Nonanol	628-99-9	50		Rose	8.46178e-07	1.12858e-05	0.000331011	0.000123121	8.53749e-06	3.70246e-05
Hexanoic acid, hexyl ester	6378-65-0	1890		Fruity, Apple-Flavor	1.46465e-05	7.44862e-05	5.51464e-05	6.66063e-05	4.70137e-05	9.41383e-05
Ethanol	64-17-5	24900		Disolvent, Ethanol	5.62598e-06	3.57478e-06	8.16318e-07	3.61884e-06	2.228e-06	3.35816e-06
Acetic acid	64-19-7	0.4	204000	pungent,vinegar	0.0564261	0.304028	0.347255	0.278406	0.162061	0.474625
1,2-Propanediol, dinitrate	6423-43-4	236		disagreeable	0	0	0.000245446	0	0	0
Hexanal	66-25-1	20		Green Grass, Fruity	0.00151179	0.00113892	0.000341917	0.000363059	0.00108902	0.000721823
Isopropyl Alcohol	67-63-0	1000	2197000	sharp, rubbingalcohol	1.04039e-06	3.54996e-07	8.44565e-06	9.0223e-06	6.94033e-06	4.35501e-06
2-Hexenal, (E)-	6728-26-3	190		Apple-Like,Planty Green,Stinkbug	5.88952e-05	6.06118e-05	1.62901e-05	2.81157e-05	4.40813e-05	3.21697e-05
Acetic acid, mercapto-	68-11-1	0.21		unpleasant	0	0.00108432	0	0	0.000608364	0.0011652
5,9-Undecadien-2-one, 6,10-dimethyl-	689-67-8	60			0	0	0	2.22661e-06	0	0
2H-Pyran-2-one, tetrahydro-6-pentyl-	705-86-2	100		Creamy, Coconut, Fruity	1.85579e-06	5.07747e-05	0.000488409	0.000355317	0	0.000155565
1-Propanol	71-23-8	53952.6		Fruity, Floral, Grassy	8.73288e-10	2.08107e-08	1.06539e-06	4.42938e-07	1.37103e-08	6.35777e-08
1-Butanol	71-36-3	3.3	990000	sweet, malty,alcohol, medicinal	0.00277562	0.00455418	0.00706496	0.00715125	0.00418142	0.00667788
1-Pentanol	71-41-0	5.5	305000		0.0173952	0.0147617	0.0336337	0.0363919	0.0131032	0.0186331
Benzene	71-43-2	470	313000	aromatic, sweet,solvent,empyreumatic	3.32399e-07	5.77e-07	5.9471e-06	2.2609e-06	1.10878e-06	2.58815e-06
Butanoic acid, 2-methyl-, ethyl ester	7452-79-1	1.6		Fruity	8.6722e-05	0.000167215	0.00429091	0.00505894	0.000168884	0.000461769
Acetonitrile	75-05-8	13000	1161000	etherish	8.34123e-07	0	0	1.32549e-07	0	0
Acetaldehyde	75-07-0	1.5	1000000	pungent, fruity, suffocating, fresh, green	0.0266427	0.0435581	0.0216352	0.0348577	0.0154773	0.0188769
Carbon disulfide	75-15-0	16	32000	vegetable, sulfide,medicinal	9.52541e-05	9.10501e-05	0.000139369	0.000158113	0.000113915	0.000155406
Dimethyl sulfide	75-18-3	0.12	8110	disagreeable,asparagus, putrid	0.00276427	0.0560912	0.127878	0.00475814	0.00339431	0.00408775
Ethylene oxide	75-21-8	820	690000	sweet, olefinic	0	0	0	0	0	1.37006e-06
2-Propanamine	75-31-0	25	700	ammoniacal, amine	0	0	0.000699999	0	0	0
Methane, nitro-	75-52-5	50000			6.59888e-10	1.25617e-10	0	0	8.34522e-11	0
Propylene oxide	75-56-9	10000	199000	sweet	1.36446e-06	0	0	0	0	0
Dichlorodifluoromethane	75-71-8	199790000		ethereal	0	0	6.42939e-13	0	0	0
Boron trifluoride	7637-07-2	1500		pungent	1.43249e-08	9.82072e-08	4.51999e-07	3.15191e-08	3.5319e-08	1.74768e-08
Dicyclopentadiene	77-73-6	0.19	20	sweet, sharp	0	0	0	0	0	0.000388041
Chlorine	7782-50-5	21	4900	suffocating, sharp,bleach	0	0	8.69182e-05	1.83663e-05	0	0
2-Methoxy-4-vinylphenol	7786-61-0	40		Spicy, Raisin	0	0	1.42365e-05	0	0	0
Linalool	78-70-6	25		Floral,Green	0	0	0.00013233	0	0	8.80083e-05
1-Propanol, 2-methyl-	78-83-1	10	165000	sweet,fusel,musty, alcohol, rubber, latex	0.000177112	0.000605597	0.000491607	0.000109143	0.000259841	0.000276506
Propanal, 2-methyl-	78-84-2	0.34	139	pungent	0.0234621	0.054021	0	0.00804818	0.0389663	0.0510665
2-Butanol	78-92-2	43	94000	sweet, malty alcohol	4.82555e-05	0.000110292	8.23879e-05	0	4.23607e-05	0
2-Butanone	78-93-3	70	330900	sweet, sharp	0.000109849	0.000342553	4.09258e-05	0	8.90836e-06	9.37484e-05
Methyl vinyl ketone	78-94-4	174		pungent	0	0	0	0	4.59847e-07	0
Propanoic acid	79-09-4	0.99	4650	sour	0.000484945	0.00627756	0.0421667	0.00881028	0.0057928	0.00685215
2-Propenoic acid, 2-methyl-	79-41-4	540	2840	pungent	6.21915e-07	0	0	0	0	0
a-Pinene	80-56-8	0.06	19000	turpentine, rosiny, pine tree, camphorous, firneedles	0	0.0435787	0.0694159	0.0533468	0.00569844	0.0738598
2-Nonanone	821-55-6	15		Fruity, Floral, Fatty	0.000865266	0.00139618	0.00527722	0.00248834	0.00104394	0.00182113
Diethyl Phthalate	84-66-2	36	363		2.15382e-06	8.09464e-06	8.8973e-05	1.08637e-05	5.88156e-06	1.20023e-05
1-Decene	872-05-9	6450		pleasant	0	1.24012e-09	5.51047e-08	7.14872e-08	5.74174e-09	0
Phenol, 2-methoxy-	90-05-1	9.2		Smoky	0	0.000122129	0.000390123	0	0	0
Naphthalene	91-20-3	1.9	1020	tar, creosote,mothballs,empyreumatic	0.00764586	0.00784855	0.010949	0.0130929	0.0048481	0.00761891
2-Naphthalenamine	91-59-8	240	320		0	2.16423e-07	0	0	0	0
2-Hexen-1-ol, (E)-	928-95-0	231.9		Fruity,Fresh,Green	5.08225e-05	2.57054e-05	1.91667e-06	3.50257e-05	6.98269e-06	4.85354e-05
Benzothiazole	95-16-9	3871		Gasoline,Leather, Roasted,Smoky And Rubber	3.53312e-07	2.58591e-07	2.59537e-07	2.64589e-07	1.49065e-07	1.89694e-07
Phenol, 2-methyl-	95-48-7	31		Phenol	0.000310846	0.000340691	0.000627323	0.000647323	0.000447181	0.000524458
o-Toluidine	95-53-4	25	6600	aromatic, amine,empyreumatic	0.000389014	0	0.000637586	9.80468e-05	0	0.000112109
Butanal, 2-methyl-	96-17-3	0.001		Cocoa, Almond	15.3204	21.9449	13.1309	13.958	17.2062	29.826
3-Pentanone	96-22-0	850	14000	acetone, fingernailpolish remover	0	1.75103e-08	0	3.83889e-07	8.72627e-08	1.05993e-07
Butyrolactone	96-48-0	35		Wcreamy, Fatty	2.58438e-07	4.06611e-05	6.05643e-05	0.000119482	4.23865e-05	4.67658e-05
Eugenol	97-53-0	7.1		Spicy, Clove	6.50639e-05	7.34367e-05	0	0	0	0
Propanoic acid, 2-methyl-, ethyl ester	97-62-1	4.5		Fruity, Strawberry	6.67042e-05	0.000100019	0.00220079	0.00190882	0.000105262	0.00033817
Propanoic acid, 2-hydroxy-, ethyl ester	97-64-3	128000		Fruity, Slightly Fattyflavor	0	5.75897e-09	1.1899e-07	1.8782e-07	1.55728e-07	1.61027e-07
2-Furanmethanol	98-00-0	8000		sweet, ether, alcohol	0	1.11347e-07	1.20653e-07	2.80018e-07	2.92884e-07	1.15893e-07
Furfural	98-01-1	2	713	bread, almond	0.000687624	0.00360148	0.00155628	0.00630817	0.00566215	0.00610947
2-Thiophenecarboxaldehyde	98-03-3	8878		Almond, Cherry	1.46746e-08	2.8459e-08	2.87266e-08	3.64631e-08	3.80945e-08	0
a-Terpineol	98-55-5	1		Piney, Iris, Teil	0.00325374	0.00360193	0.00186056	0.00870993	0.00094487	0.00924489
gamma-Terpinene	99-85-4	3260		Oily, Smoky	0	1.4119e-07	1.07712e-07	3.36793e-07	3.57694e-08	6.12955e-07
p-Cymene	99-87-6	11.4			0	0	9.44711e-05	0	1.34342e-05	0.000178454

## Sheet: ROAV>1
name	CAS	RangeofOdorMin	RangeofOdorMax	OdorCharacter	Day0_ROAV	Day2_ROAV	Day4_ROAV	Day6_ROAV	Day8_ROAV	Day10_ROAV
Heptanal	111-71-7	0.003		Citrus, Fatty, Rancid	7.67567	6.74372	3.89299	10.0846	10.5916	10.3892
2-Undecanone	112-12-9	0.004355		Orange, Fresh, Green	34.6784	29.6561	73.2099	60.4654	19.1997	36.5587
2-Nonenal, (E)-	18829-56-6	0.0002		Fatty, Cucumber	100	100	99.1209	100	90.3928	100
2-Dodecenal, (E)-	20407-84-5	0.00053		Green, Fatty, Sweet	0.370865	2.06214	0	0	1.81306	3.71781
2-Octenal, (E)-	2548-87-0	0.003		Nuts, Green, Fatty	29.7783	28.1579	15.1858	23.4374	21.7165	33.0166
Furan, 2-pentyl-	3777-69-3	0.006		Green Beans, Vegetable	17.4037	16.0365	34.7756	24.4823	14.6667	12.0494
2,3-Butanedione	431-03-8	0.002	2900	pleasant, buttery	16.4388	35.0436	30.4412	19.4748	15.5399	12.9091
1-Octen-3-one	4312-99-6	0.005		Mushroom-Like	10.3661	4.16402	10.4581	8.26531	6.32489	8.17292
Butanoic acid, 3-methyl-	503-74-2	0.02		Rancid Cheese, Sweaty, Putrid	0.11144	0.433207	2.26529	2.27448	0.786778	2.91781
2-Undecenal, E-	53448-07-0	0.0004		Fatty, Waxy, Rose, Citrus	0	0	0	0	25	0
Butanal, 2-methyl-	96-17-3	0.001		Cocoa, Almond	15.3204	21.9449	13.1309	13.958	17.2062	29.826
