# Supplementary material
Source: Research Square preprint supplement (doi:10.21203/rs.3.rs-9128298/v1)
Supplement: Supplementary file 3 [file 59e32916bb325a960fa51c13.docx]

**Table S1** Numbers of volatile compounds in each chemical class during 10 days of postharvest storage

| **Chemical class** | **Day 0** | **Day 2** | **Day 4** | **Day 6** | **Day 8** | **Day 10** |
| --- | --- | --- | --- | --- | --- | --- |
| Organoheterocyclic compounds | 516 | 539 | 477 | 543 | 558 | 578 |
| Hydrocarbons | 451 | 469 | 456 | 492 | 447 | 516 |
| Benzenoids | 278 | 316 | 317 | 348 | 318 | 376 |
| Ketones | 282 | 294 | 270 | 300 | 319 | 309 |
| Esters | 197 | 266 | 261 | 293 | 264 | 285 |
| Alcohols | 248 | 274 | 271 | 279 | 275 | 266 |
| Lipids and lipid‑like molecules | 194 | 231 | 237 | 235 | 234 | 257 |
| Heterocyclic compounds | 116 | 127 | 131 | 124 | 142 | 125 |
| Ethers | 95 | 131 | 96 | 132 | 143 | 149 |
| Carboxylic acids | 77 | 99 | 97 | 101 | 121 | 99 |

Table S2 Relative content (%) of each chemical class during 10 days of posthasrvest storage

| **Chemical class** | **Day 0** | **Day 2** | **Day 4** | **Day 6** | **Day 8** | **Day 10** |
| --- | --- | --- | --- | --- | --- | --- |
| Organoheterocyclic compounds | 15.69 | 15.02 | 17.06 | 15.36 | 16.52 | 12.68 |
| Hydrocarbons | 10.42 | 8.14 | 7.61 | 8.45 | 7.64 | 9.05 |
| Benzenoids | 3.20 | 5.03 | 4.17 | 5.40 | 3.79 | 5.62 |
| Ketones | 16.42 | 15.03 | 8.82 | 10.62 | 18.48 | 11.12 |
| Esters | 14.36 | 15.67 | 24.40 | 21.78 | 15.03 | 21.58 |
| Alcohols | 23.44 | 21.23 | 17.75 | 19.31 | 17.14 | 16.22 |
| Lipids and lipid‑like molecules | 6.89 | 11.86 | 10.88 | 7.72 | 11.50 | 14.80 |
| Heterocyclic compounds | 5.19 | 2.59 | 3.34 | 2.69 | 2.56 | 2.59 |
| Ethers | 0.60 | 1.73 | 1.26 | 4.61 | 2.24 | 1.81 |
| Carboxylic acids | 3.79 | 3.71 | 4.72 | 4.06 | 5.10 | 4.53 |
