# Supplementary material
Source: Research Square preprint supplement (doi:10.21203/rs.3.rs-9128298/v1)
Supplement: Supplementary file 4 [file 6fbf5394b271a72e43e8760d.xlsx]

## Sheet: up-9c79d2459a576053.overlap
$`up-Stage I v.s. Stage III`
[1] "1-(Cyclododec-1-en-1-yl)ethanone"
[2] "Benzaldehyde, 2,4-dihydroxy-3,6-dimethyl-"
[3] "1-Methyl-1H-1,2,4-triazole"
[4] "Benzamide, N-(2-piperidinylmethyl)-2,5-bis(2,2,2-trifluoroethoxy)-"
[5] "2,7-Methanonaphthalene-3-methanol, 1,2,3,4,4a,7,8,8a-octahydro-"
[6] "Cyclohexaneethanol, 2-methylene-"
[7] "1-Hexanol, 3-methyl-"
[8] "Octanoic acid"
[9] "3,6-Heptanedione"
[10] "3-Ethyl-4-nonanol"
[11] "Pentadecane, 4-methyl-"
[12] "1,4-Benzenediol, 2,6-bis(1,1-dimethylethyl)-"
[13] "Hexanoic acid, 4-methylpentyl ester"
[14] "Nonanoic acid, 2-oxo-, methyl ester"
[15] "Coumarin"
[16] "1,2,4,5-Tetroxane, 3,3,6,6-tetramethyl-"
[17] "2H-1-Benzopyran, 3,4-dihydro-"
[18] "p-Sec-butylphenyl 2,3-epoxypropyl ether"
[19] "trans-1-Phenyl-1-pentene"
[20] "Cyclodecene, 3-bromo-"
[21] "4-(2-(Acryloyloxy)ethoxy)-4-oxobutanoic acid"
[22] "2-Oxooctanoic acid"
[23] "2-Furanmethanol, 5-ethenyltetrahydro-a,a,5-trimethyl-, cis-"
[24] "Undecane, 5-methylene-"
[25] "1,2,3-Trimethylindene"
[26] "(E)-1-Methyl-4-(6-methylhept-5-en-2-ylidene)cyclohex-1-ene"
[27] "5-Hepten-3-yn-2-ol, 6-methyl-5-(1-methylethyl)-"
[28] "8-Nonenoic acid, ethyl ester"
[29] "Formamide, N-(2-methylphenyl)-"
[30] "Methoxyacetic acid, butyl ester"
[31] "Benzene, octyl-"
[32] "Bicyclo[2.2.1]heptane, 2-(1-methylpropyl)-"
[33] "Propanedioic acid, amino-, diethyl ester"
[34] "2-Hydroxy-3-pentanone"
[35] "3,4-Methylenedioxypropiophenone"
[36] "Cyclohexane"
[37] "2-Furanmethanol"
[38] "Pentanoic acid"
[39] "2-n-Hexylcyclopentanone"
[40] "Heptane, 4-methylene-"
[41] "Butanoic acid, 3-methyl-"
[42] "Benzene, 2-chloro-5-methoxy-1,3-dimethyl-"
[43] "1,3-Benzodioxole, 2-acetyl-4-methoxy-2-methyl-"
[44] "2-Acetyl-5-methylfuran"
[45] "Dodecanoic acid"
[46] "2,4-Heptadiene, 2,4-dimethyl-"
[47] "3-Heptanone, 2-methyl-"
[48] "5-Methyl-2-thiophenecarboxaldehyde"
[49] "Cyanamide, dimethyl-"
[50] "Thiophene, 3-methoxy-"
[51] "2,9-Dimethyl-5-decyne"
[52] "2H-Pyran, 3,4-dihydro-6-methyl-"
[53] "Hexanoic acid, 2-methylpropyl ester"
[54] "Pentane, 1-iodo-"
[55] "Cyclohexene, 3-(bromomethyl)-"
[56] "2-Buten-1-one, 1-(6,7,7-trimethyl-2,3-dioxabicyclo[2.2.2]oct-5-en-1-yl)-, [1R-[1a(E),4beta]]-"
[57] "Oxepine, 2,7-dimethyl-"
[58] "Maleic anhydride"
[59] "3-Octanol, 2-methyl-"
[60] "4-Octanol, 2-methyl-"
[61] "4-Methylene-3,4-dihydroisocoumarin"
[62] "9-Octadecyne"
[63] "1-Dodecene"
[64] "N-Cyclohexyl-2-pyrrolidone"
[65] "2-Heptanol"
[66] "Benzene, 1,4-dichloro-"
[67] "Dichloroxylenol"
[68] "Dichloroacetic acid, 2-tetrahydrofurylmethyl ester"
[69] "1-Decalone (cis-trans)"
[70] "Cyclohexanone, 2-methylene-5-(1-methylethyl)-"
[71] "3,5-Dimethyl-4-propyl-1H-pyrazole"
[72] "Cyclohexanone, 2-(1-methylethyl)-"
[73] "Benzene, 1-(12Z)-12-heptadecenyl-3,5-dimethoxy-"
[74] "Butanoic acid, 3-methyl-, 5-methyl-2-(1-methylethyl)cyclohexyl ester, (1a,2beta,5a)-"
[75] "Hexanoic acid, ethyl ester"
[76] "1,2-Benzenediol, 3,5-bis(1,1-dimethylethyl)-"
[77] "4-(1,2-Dimethyl-cyclopent-2-enyl)-butan-2-one"
[78] "Cyclohexene, 2-butyl-1,3,3-trimethyl-"
[79] "1,2,4-Metheno-1H-indene, octahydro-1,7a-dimethyl-5-(1-methylethyl)-, [1S-(1a,2a,3abeta,4a,5a,7abeta,8S*)]-"
[80] "Cyclohexene, 3-(1,5-dimethyl-4-hexenyl)-6-methylene-, [S-(R*,S*)]-"
[81] "2-Naphthyl methyl ketone"
[82] "Hexanethioic acid, S-heptyl ester"
[83] "2-{[(5-Methyl-2-thienyl)methyl]amino}-1-butanol"
$`up-Stage II v.s. Stage III`
[1] "2,6-Octadiene, 4,5-dimethyl-"
[2] "Cyclohexene,1-cyclohexyl-"
[3] "trans-4-Pentylcyclohexanecarboxylic acid"
[4] "2H-Pyran-2-carboxaldehyde, 3,4-dihydro-2,5-dimethyl-"
[5] "2-[(2-Fluorobenzyl)amino]-2-methyl-1-propanol"
[6] "4-Octanol, 4,7-dimethyl-"
[7] "Ethanone, 1-(4-methylphenyl)-"
[8] "4-Pyridinecarboxaldehyde"
[9] "Pyridine, 3-chloro-"
[10] "3-Methyl-2-sulfanyl-3,5-dihydro-4H-imidazol-4-one"
[11] "Undecane, 3,7-dimethyl-"
[12] "Neral"
[13] "2-Octenal, (E)-"
[14] "1,3-Propanediol, 2-ethyl-2-(hydroxymethyl)-"
[15] "2-Ethyl-5-n-propylphenol"
[16] "Benzenepropanenitrile, beta-oxo-"
[17] "1H-Inden-1-one, 2,3-dihydro-3,3,5,6-tetramethyl-"
[18] "Amyl cyclopentenone"
[19] "a-Farnesene"
[20] "Cyclohexene, 3-(3-methyl-1-butenyl)-, (E)-"
[21] "Phosphonic acid, methyl-, dicyclopentyl ester"
[22] "3-Hydroxypyridine monoacetate"
[23] "2-Methylindene"
[24] "Bicyclo[2.2.2]octane, 1,2,3,6-tetramethyl-"
[25] "2-Amino-4-acetamino anisole"
[26] "3-Octanol"
[27] "1,2-Dipropylcyclopropene"
[28] "6-Dodecanone"
[29] "Bicyclo[6.1.0]non-1-ene"
[30] "Propanoic acid, anhydride"
[31] "2-Amino-4-tert-amylphenol"
[32] "3-Methoxy-5-pentylphenol"
[33] "1-Pentanone, 1-(2-pyridinyl)-"
[34] "5H-Indeno[1,2-b]pyridin-5-one"
[35] "5,6-Dihydro-2-phenyl-4H-1,3-oxazin-5-one"
[36] "2-Pentene, 3-ethyl-2-methyl-"
[37] "6-Octenal, 3,7-dimethyl-, (S)-"
[38] "Pyridine, 2-ethyl-"
[39] "n-Heptyl methylphosphonofluoridate"
[40] "Furan, 2,5-diethyltetrahydro-"
[41] "4-N-Hexylaniline"
[42] "6,7-Epoxy-trans-syn-tricyclo[7.3.0.0(2,6)]dodecane, (+-) (6S, 7R)-"
[43] "1,3-Oxathiane"
[44] "Benzene, 1-ethyl-4-methyl-"
[45] "Furan, 3-pentyl-"
[46] "n-Pentyl isothiocyanate"
[47] "Benzene, 1-(1,5-dimethyl-4-hexenyl)-4-methyl-"
[48] "trans-Undec-4-enal"
[49] "2,6-Octadienal, 3,7-dimethyl-, (E)-"
[50] "Benzoic acid, 3-methylbutyl-2 ester"
[51] "3,4-Hexanedione, 2,2,5-trimethyl-"
[52] "3-Cyclohexene-1-carboxaldehyde, 4-methyl-"
[53] "5-Heptenal, 2,6-dimethyl-"
[54] "1H-Indene, 1-ethylideneoctahydro-, trans-"
[55] "1-Heptene"
[56] "2-n-Butylacrolein"
[57] "Dibenzofuran"
[58] "1-Methoxyadamantane"
[59] "1,3-Dioxolane, 2-cyclohexyl-4,5-dimethyl-"
[60] "Pyridine, 3-methyl-2-phenyl-"
[61] "Furan, 2,3-dihydro-"
[62] "Hexanoic acid, 1-methylethyl ester"
[63] "Cyclopentene, 3-methyl-"
[64] "p-Hydroxyphenylacetone"
[65] "Butanal, 2-methyl-"
[66] "Acetoin"
[67] "Cyclopentanone, 2-octyl-"
[68] "3-Hydroxy-4-methylbenzaldehyde"
[69] "2-Heptenal, (E)-"
[70] "4-Decenal, (E)-"
[71] "2-Propanol, 1-methoxy-"
[72] "1H-Inden-1-one, octahydro-"
[73] "2-Propenal"
[74] "Spiro[cyclohexane-1,2'-[2H]-imidazo[4,5-b]pyridine], 1',3'-dihydro-"
[75] "2,2,4-Trimethyl-1,3-pentanediol diisobutyrate"
[76] "Cyclopropane, 1-methyl-2-pentyl-"
[77] "2-Methyl-4-octenal"
[78] "Oxazole, trimethyl-"
[79] "2-(2-Furyl)piperidine"
[80] "4-n-Hexylthiane"
[81] "Aminomethanesulfonic acid"
[82] "Decanoic acid, octyl ester"
[83] "Ethyl cyanoacetate"
[84] "6-Thiopyrazolo[3,4-d]pyrimidin-4,6(5H,7H)-dione-3-carboxamide"
[85] "3,4-Dichlorophenyl isothiocyanate"
[86] "2-Butylhept-2-enal"
[87] "Acetic acid, mercapto-"
[88] "2-Furanmethanol, tetrahydro-5-methyl-, trans-"
[89] "1H-Indene, 1-methyl-"
[90] "Isoavocadienofuran"
[91] "3-Buten-2-one, 4-(2,6,6-trimethyl-1-cyclohexen-1-yl)-"
[92] "2(3H)-Furanone, 5-ethenyldihydro-5-methyl-"
[93] "Carane, 4,5-epoxy-, trans"
[94] "2,2-Dimethyl-3-octanone"
[95] "Bicyclo[3.1.1]hept-2-ene, 2,6-dimethyl-6-(4-methyl-3-pentenyl)-"
[96] "2,2'-Methylenedithiophene"
[97] "2-Butenal, 2-methyl-"
[98] "Benzene, 1,4-diethoxy-"
[99] "Benzoxazole, 2-methyl-"
[100] "7-Dodecen-6-one"
[101] "4-Nonene"
[102] "Acetaldehyde, butylhydrazone"
[103] "(E)-beta-Farnesene"
[104] "p-Xylene"
[105] "Ethanone, 2,2-dihydroxy-1-phenyl-"
[106] "2-Butenal, 3-methyl-"
[107] "Benzeneacetic acid, a-oxo-, ethyl ester"
[108] "5,6-Decanedione"
[109] "Benzaldehyde, 2-hydroxy-6-methyl-"
[110] "Pyridine, 4-pentyl-"
[111] "4-Pentenoic acid ethyl ester"
[112] "5,8-Tridecadione"
[113] "2,5-di-tert-Butyl-1,4-benzoquinone"
[114] "Butanal"
[115] "Hexanal, 3-methyl-"
[116] "(+)-2-Bornanone"
[117] "2,5-Cyclohexadien-1-one, 4,4-dimethyl-3-phenyl-"
[118] "7,9-Di-tert-butyl-1-oxaspiro(4,5)deca-6,9-diene-2,8-dione"
[119] "1-Butanone, 1-bicyclo[4.1.0]hept-7-yl-"
[120] "Pentadecanal-"
[121] "3,4-Dimethoxycinnamic acid"
[122] "2,4-Hexadienal, (E,E)-"
[123] "Benzoic acid, 2,4-dimethoxy-6-methyl-, 4-carboxy-3-methoxy-5-methylphenyl ester"
[124] "Phenol, 2-(2-methylpropyl)-"
[125] "2-Undecenal"
[126] "3-Heptanone"
[127] "6,7-Dodecanedione"
[128] "1H-Pyrrole-2-carboxaldehyde"
[129] "1-(1,2-Dimethyl-cyclopent-2-enyl)-ethanone"
[130] "Thiazole-4-carboxaldehyde"
[131] "2-Octen-1-ol, (E)-"
[132] "Furan, 2-ethyl-"
[133] "1-Phenyl-1-butene"
[134] "1-(2,4-Dihydroxyphenyl)-1-butanone"
[135] "1,2,5-Thiadiazole"
[136] "2-Heptanone, 6-(2-furanyl)-6-methyl-"
[137] "2,4-Octadienal, (E,E)-"
[138] "Acetaldehyde, (phenylthio)-"
$`up-Stage II v.s. Stage III:up-Stage I v.s. Stage III`
[1] "1-Methyl-2-n-hexylbenzene"
[2] "Quinoline, decahydro-, trans-"
[3] "2-Furanacetaldehyde, a-propyl-"
[4] "Pentanal, 2-methyl-"
[5] "Furan, 2-(2-propenyl)-"
[6] "2,4-Nonanedione"
[7] "Bicyclo[3.1.0]hex-2-ene, 4-methyl-1-(1-methylethyl)-"
[8] "1,4-Pentadien-3-one"
[9] "5-Hydroxypentanal"
[10] "4-Hexylanisole"
[11] "2,4(1H,3H)-Pyrimidinedione, 5-amino-"
[12] "Hexanal, 5-methyl-"
[13] "2,7-Dioxatricyclo[4.4.0.0(3,8)]dec-4-ene"
[14] "3-Furaldehyde"
[15] "Cyclohexane, 1,1'-(1,2-dimethyl-1,2-ethanediyl)bis-, (R*,R*)-((+/-))-"
[16] "Benzene, 1-methoxy-2-pentyl-"
[17] "Humulenol-II"
[18] "3-Methyl-2-(2-methyl-2-butenyl)-furan"
[19] "Palmitic acid vinyl ester"
[20] "Cyclohexanone"
[21] "1,3-Butanedione, 1-(2,6,6-trimethyl-1-cyclohexen-1-yl)-"
[22] "1-Penten-3-one, 2,4-dimethyl-"
[23] "Cyclopropanecarboxaldehyde, 2-methyl-2-(4-methyl-3-pentenyl)-, trans-(.+-.)-"
[24] "Furan, 2-hexyl-"
[25] "Hexane, 1-(ethenyloxy)-"
[26] "Octanoic acid, methyl ester"
[27] "1H-Imidazole, 1-methyl-5-nitro-"
[28] "4-Hydroxy-2,6,6-trimethyl-3-oxocyclohexa-1,4-dienecarbaldehyde"
[29] "Furan, 2-ethyl-5-methyl-"
[30] "6,7-Dimethoxy-2-tetralone"
[31] "2-(5-Methyl-2-furyl)piperidine"
[32] "2-Hexyl-2-cyclopenten-1-one"
[33] "1,2-Propanedione, 1-phenyl-"
[34] "Caprylic anhydride"
[35] "1H-Benzimidazole, 5,6-dimethyl-"
[36] "Naphthalene, 2-methyl-1-propyl-"
[37] "1,2,4-Triazin-3-amine, 5,6-dimethyl-"
[38] "Thiophene, 2-ethyl-5-isopentyl-"
[39] "1H-3a,7-Methanoazulene, 2,3,4,7,8,8a-hexahydro-3,6,8,8-tetramethyl-, [3R-(3a,3abeta,7beta,8aa)]-"
[40] "(E)-Hexadec-9-enoic acid"
[41] "Phenol, 4-(1,1-dimethylpropyl)-"
[42] "2,7(1H,3H)-Naphthalenedione, hexahydro-"
[43] "Benzaldehyde, 2-methyl-"
[44] "Nonanoic acid, 5-methyl-, ethyl ester"
[45] "2,7-Dioxatricyclo[4.4.0.0(3,8)]decan-4-amine, stereoisomer"
[46] "(R,Z)-2-Methyl-6-(4-methylcyclohexa-1,4-dien-1-yl)hept-2-en-1-ol"
[47] "Benzene, 1-ethenyl-4-methoxy-"
[48] "(1R,4R,4aS,8aR)-4,7-Dimethyl-1-(prop-1-en-2-yl)-1,2,3,4,4a,5,6,8a-octahydronaphthalene"
[49] "(1R,4R,5S)-1,8-Dimethyl-4-(prop-1-en-2-yl)spiro[4.5]dec-7-ene"
[50] "2-Isopropylbenzaldehyde"
[51] "Pentanal, 3-methyl-"
[52] "1-Butanamine, N-(2-furanylmethylene)-3-methyl-"
[53] "2H-Pyran, 2-ethoxytetrahydro-"
[54] "3,7-Dimethyloct-6-ene-1,2,3-triol"
[55] "Cyclopentane, pentylidene-"
[56] "3-Pyridinamine, N-acetyl-2-nitro-"
[57] "5-Undecen-4-one"
[58] "2-Butenal, (Z)-"
[59] "Acetaldehyde, ethylhydrazone"
[60] "2-Propanone, 1-hydroxy-"
[61] "2-Pentadecanone"
[62] "Benzenepropanal, a-methyl-"
[63] "4-Hepten-3-one, 5-ethyl-2,4-dimethyl-"
[64] "Nonanoic acid, heptyl ester"
[65] "1,2-Cyclopentanediol, 3-methyl-"
[66] "Cyclohexene, 3-(1-hexenyl)-, (E)-"
[67] "4-Nitrophenyl 1,3-thiazol-5-ylmethyl carbonate"
[68] "3-Methyl-1-(3-pyridyl)-1-butanone"
[69] "3,5-Octadiene, 2,7-dimethyl-, (Z,Z)-"
[70] "2(3H)-Furanone, dihydro-5-methyl-"
[71] "2H-Indol-2-one, 3-ethyl-1,3-dihydro-1-methyl-"
[72] "Bis(N-methoxy-N-methylamino)methane"
[73] "Octane, 1,1-diethoxy-"
[74] "Isopilocarpine"
[75] "9-Oxononanoic acid"
[76] "3-Acetoxy-6-methoxynaphthalene"
[77] "8-Oxabicyclo[3.2.1]oct-6-en-3-one"
[78] "Butyric acid, 2,2-dimethyl-, vinyl ester"
[79] "Heptanophenone"
[80] "2-Butanol, (R)-"
[81] "(S)-5-Hydroxymethyl-2[5H]-furanone"
[82] "1,3-Cyclohexadiene, 5-(1,5-dimethyl-4-hexenyl)-2-methyl-, [S-(R*,S*)]-"
[83] "1-(1,3-Dimethyl-1H-pyrazol-4-yl)ethanone"
[84] "Tridecane, 1-iodo-"
[85] "Senkyunolide N"
[86] "Naphthalene, 1,2,3,5,6,8a-hexahydro-4,7-dimethyl-1-(1-methylethyl)-, (1S-cis)-"
[87] "Thiazole"
[88] "Cyclopropanecarboxylic acid"
[89] "trans-Arbusculone"
[90] "Benzene, 1-methoxy-4-(1-methylethyl)-"
[91] "Benzoic acid, 4-formyl-, ethyl ester"
[92] "Acetic acid, oxo-"
[93] "Pentanoic acid, 4-methyl-, phenylmethyl ester"
[94] "2-Decenal, (E)-"
[95] "Thiopivalic acid"
[96] "beta-Bisabolene"
[97] "2',4'-Dihydroxy-3'-methylbutyrophenone"
[98] "Heptane, 1,1-diethoxy-"
[99] "7-Acetyl-6-ethyl-1,1,4,4-tetramethyltetralin"
[100] "Neopentyl isobutyl ketone"
[101] "(E)-Atlantone"
[102] "Methyl 1H-benzimidazole-5-carboxylate"
[103] "5-Hexyl-2-furaldehyde"
[104] "5-Cyano-1,2,3-thiadiazole"
[105] "Furan, tetrahydro-2,5-dimethyl-, trans-((+/-))-"
[106] "2-Heptanone, 6-methyl-"
[107] "(R)-1-Methyl-4-(6-methylhept-5-en-2-yl)cyclohexa-1,4-diene"
[108] "N-Methyl-2-isopropoxycarbonylazetidine"
[109] "Cyclohexene, 4-ethenyl-4-methyl-3-(1-methylethenyl)-1-(1-methylethyl)-, (3R-trans)-"
[110] "6-Pentadecanone"
[111] "1H-Tetrazol-5-amine"
[112] "Thiazole, 4-butyl-2,5-dimethyl-"
[113] "1,3,5-Hexatriene, 3-methyl-, (E)-"
[114] "Pyridine, 3-methyl-5-propyl-"
[115] "Thiophene, tetrahydro-2-methyl-"
[116] "4-Nonanol"
[117] "1-Propanol, 3-ethoxy-"
[118] "4-Propylcyclohexanone"
[119] "2,4-Heptadienal, (E,E)-"
[120] "2-Ethoxytetrahydrofuran"
[121] "Oxirane, hexyl-"
[122] "Bicyclo[3.3.1]nonan-9-ol"
[123] "Dimethyl (2-oxoheptyl)-phosphonate"
[124] "Hexanoic acid, 2-ethylhexyl ester"
[125] "1H-Indol-3-ol, acetate"
[126] "7-Ethyl-3,4-dihydro-1(2H)-naphthalenone"
[127] "Fenipentol"
[128] "Hexane, 1-nitro-"
[129] "Bicyclo[5.3.0]dec-1(7)-ene-2,5-dione"
[130] "2-Octenoic acid"
[131] "2-Decanone"
[132] "Ethanedioic acid, diethyl ester"
$`up-Stage I v.s. Stage II`
[1] "1-Pentanol, 3-methyl-"
[2] "Propanal, 2-(4-ethoxyphenyl)-2-methyl-"
[3] "3a,6-Methano-3aH-indene, 2,3,4,5,6,7-hexahydro-"
[4] "Propanoic acid, pentyl ester"
[5] "1-Heptylcyclohexene"
[6] "11-Heneicosanol"
[7] "2,6-Heptadien-1-ol, 2,4-dimethyl-"
[8] "Cyclohexane, 1-bromo-4-methyl-"
[9] "1,3-Cyclopentanedione, 2-isopentyl-"
[10] "(1-Methylenebut-2-enyl)benzene"
[11] "6,10-Dodecadien-1-ol, 3,7,11-trimethyl-"
[12] "2-Cyclohexen-1-ol, 1-butyl-3-methyl-"
[13] "1,7-Octadien-3-ol, 2,6-dimethyl-"
[14] "Pyridine, 2-ethenyl-"
[15] "Ethanol, 2-(dodecyloxy)-"
[16] "Hexanoic acid, 2-tetradecyl ester"
[17] "Cyclohexanone, 2-methyl-"
[18] "trans-beta-Ocimene"
[19] "Bicyclo[3.1.0]hex-2-ene, 4-methylene-1-(1-methylethyl)-"
[20] "5,9-Undecadien-2-ol, 6,10-dimethyl-"
[21] "Benzeneethanol, a-(phenylmethyl)-"
[22] "5-Pentylcyclohexa-1,3-diene"
[23] "Diethyl carbitol"
[24] "Spiro[2.4]heptane-5-methanol, 5-hydroxy-"
[25] "trans-2-undecenoic acid"
[26] "Benzene, 1-methyl-4-propyl-"
[27] "6-Hepten-2-ol, 2,6-dimethyl-"
[28] "Pyrrole, 2-methyl-5-phenyl-"
[29] "Ethyl trans-4-decenoate"
[30] "3-Octenoic acid, (E)-"
[31] "Decanoic acid, methyl ester"
[32] "Benzoic acid, 4-(3-hydroxy-3-methyl-1-butynyl)-, methyl ester"
[33] "n-Tridecan-1-ol"
[34] "2-Cyclopenten-1-one, 2-pentyl-"
[35] "Benzenemethanol, 2,4-dichloro-"
[36] "1,4-Methanoazulen-9-one, decahydro-1,5,5,8a-tetramethyl-, [1R-(1a,3abeta,4a,8abeta)]-"
[37] "3-Fluorophenylacetic acid"
[38] "Benzene, (1,3-dimethylbutyl)-"
[39] "Bicyclo[2.2.1]heptane, 2-(3-methylbutyl)-"
[40] "Cyclopentene, 4,4-dimethyl-"
[41] "1,3,7-Octatriene, 2,7-dimethyl-"
[42] "Propanoic acid, 2-methyl-, hexyl ester"
[43] "Naphthalene, 1,2-dimethyl-"
[44] "2-Cyclopenten-1-one, 3-ethyl-2-hydroxy-"
[45] "Pentanoic acid, 2-hydroxy-4-methyl-, ethyl ester"
[46] "Retinol, acetate"
[47] "6-Methyl-3,5-heptadiene-2-one"
[48] "1-Pentyn-3-ol"
[49] "Cyclopentanemethanol"
[50] "d-Dodecalactone"
[51] "Diisopropylaminoacrylonitryl"
[52] "Diethyl carbonate"
[53] "Isobutyl chloroformate"
[54] "2,4-Dimethylcyclohex-3-ene-1-carbaldehyde"
[55] "Pyrazine, 2-methoxy-3-(1-methylethyl)-"
[56] "Phenol, 2-propyl-"
[57] "1-Propanone, 1-(2,4-dimethylphenyl)-"
[58] "Pyridine, 3-(phenylmethyl)-"
[59] "5-Hepten-1-ol, 2,6-dimethyl-"
[60] "1-Butanol, 3-methyl-"
[61] "3-Buten-2-one, 3-methyl-4-(1,3,3-trimethyl-7-oxabicyclo[4.1.0]heptan-1-yl)-"
[62] "(E)-Hexadec-2-enal"
[63] "Benzene, 1-pentenyl-"
[64] "Furan, 3-(4-methyl-3-pentenyl)-"
[65] "Nonane, 2,3-dimethyl-"
[66] "Bicyclo[5.1.0]octane, 8-(1-methylethylidene)-"
[67] "Prenol"
[68] "Tricyclo[4.2.2.0(2,5)]dec-7-en-3-one"
[69] "3-Nonene, (E)-"
[70] "1-Hexanethiol"
[71] "1-Hexadecyne"
[72] "Alanine"
[73] "2-Pentanamine, N-ethyl-4-methyl-"
[74] "Phenol"
[75] "1,4-Undecadiene, (E)-"
[76] "Propanoic acid, hexyl ester"
[77] "trans-Hexahydrophthalide"
[78] "Cyclopentane, butyl-"
[79] "2-Heptanol, 5-ethyl-"
[80] "3-Ethyl-2-methyl-1-heptene"
[81] "N-Acetyl-3-pyrroline"
[82] "Benzenecarbothioic acid, S-methyl ester"
[83] "3-Methyldodecanoic acid"
[84] "(R)-(-)-3-Methyl-2-butanol"
[85] "2,4-Heptanedione"
[86] "Acetyl valeryl"
[87] "Hexane, 1-methoxy-"
[88] "1,6-Octadien-3-ol, 3,7-dimethyl-, formate"
[89] "D-Limonene"
[90] "Acetic acid, pentyl ester"
[91] "Hotrienol"
[92] "14-Hydroxycaryophyllene"
[93] "Triisobutyl phosphate"
[94] "Etilefrine"
[95] "Cyclohexanone, 2-(hydroxymethylene)-3-methyl-6-(1-methylethyl)-"
[96] "1-Decanol"
[97] "3-Octanol, acetate"
[98] "Butanedioic acid, ethyl 3-methylbutyl ester"
[99] "Pentanoic acid, 4-methyl-, ethyl ester"
[100] "(Z),(Z)-2,4-Hexadiene"
[101] "2-Butanol, 2,3-dimethyl-, acetate"
[102] "3-Phenylpropanol, 2'-hydroxy-3,3,3',4'-tetramethyl-"
[103] "gamma-Terpinene"
[104] "2-Undecene, (E)-"
[105] "Benzenepentanoic acid, methyl ester"
[106] "2-Methylidenecyclohexan-1-one"
[107] "1,5-Dimethyl-6-oxa-bicyclo[3.1.0]hexane"
[108] "Bicyclo[2.2.1]heptane-2,3-diol, 1,7,7-trimethyl-, (exo,exo)-"
[109] "Cyclobutanone, 2-methyl-"
[110] "Cyclopentadiene, 2,5,5-trimethyl-"
[111] "1H-Indene, 2,3-dihydro-1,1-dimethyl-"
[112] "(2E,4E)-2,4-Dodecadienoic acid"
[113] "Undecanoic acid, 2-ethyl-, methyl ester"
[114] "(-)-beta-Bourbonene"
[115] "4-(2-Furyl)-1,3-thiazol-2-ylamine"
[116] "1H-Pyrazole-1-carboximidamide"
[117] "Cyclohexanol, 2-methyl-5-(1-methylethyl)-, (1a,2a,5a)-"
[118] "Acetic acid, nonyl ester"
[119] "2-Isopropyl-5-methyl-1-heptanol"
[120] "Bicyclo[3.1.0]hexan-2-one, 3,3,6-trimethyl-"
[121] "1,2,4-Trithiolane"
[122] "5-Hepten-2-ol, 6-methyl-"
[123] "Thiophene, 2-butyl-5-hexyl-"
[124] "2(3H)-Benzofuranone, hexahydro-4,4,7a-trimethyl-"
[125] "(4aS)-3,5,5,9-Tetramethyl-1,2,5,6,7,8-hexahydro-4a,8-epoxybenzo[7]annulene"
[126] "1-Octanol, 2-nitro-"
[127] "1-Propanol, 3-(methylthio)-"
[128] "Naphthalene, 1,2,3,4-tetrahydro-1-propyl-"
[129] "Aniline, N-methyl-"
[130] "1,3,7-Octatriene, 3,7-dimethyl-"
[131] "t-Butylhydroquinone"
[132] "Cyclohexanol, 2-methyl-, cis-"
[133] "1,1,2,2,3,3-Hexamethylindane"
[134] "1H-Inden-1-ol, 2,4,5,6,7,7a-hexahydro-4,4,7a-trimethyl-"
[135] "1-Penten-3-one, 4,4-dimethyl-1-phenyl-"
[136] "Butanoic acid, 2-methyl-, propyl ester"
[137] "2-Hexenoic acid, butyl ester, (E)-"
[138] "a-Phellandrene"
[139] "2,6-Octadien-1-ol, 3,7-dimethyl-, (Z)-"
[140] "Heptane, 2,3-dimethyl-"
[141] "Cyclohexanol"
[142] "Undecanal, 2-methyl-"
[143] "2-Butanone, 3,4-epoxy-3-ethyl-"
[144] "1-(7-Hydroxy-1,6,6-trimethyl-10-oxatricyclo[5.2.1.0(2,4)]dec-9-yl)ethanone"
[145] "1-Pentadecyne"
[146] "Vinyl trans-cinnamate"
[147] "2-Decen-1-ol, (E)-"
[148] "Phenol, 3-methyl-6-propyl-"
[149] "5-Undecanone, 2-methyl-"
[150] "Thiophene, 2,5-bis(3-methylbutyl)-"
[151] "Benzene, 1,2,4,5-tetramethyl-"
[152] "5-Undecene, 7-ethenyl-"
[153] "3-Octyn-1-ol"
[154] "Methyl Isobutyl Ketone"
[155] "Pyrazine, 2,5-dimethyl-"
[156] "(-)-Myrtenol"
[157] "Benzofuran, 2,3-dihydro-"
[158] "N-(4-Hydroxyphenyl)propanamide, O-acetyl-"
[159] "(E)-2,6-Dimethylocta-3,7-diene-2,6-diol"
[160] "1,8(2H,5H)-Isoquinolinedione, 6,7-dihydro-3-hydroxy-"
[161] "2,4-Nonadienal"
[162] "gamma-Dodecalactone"
[163] "(3aR,4R,8R,8aS)-3a,4,7,8a-Tetramethyl-1,2,3,3a,4,5,8,8a-octahydro-4,8-methanoazulene"
[164] "(3E,5Z)-1,3,5-Undecatriene"
[165] "7-Oxabicyclo[4.1.0]heptan-2-one, 3-methyl-6-(1-methylethyl)-"
[166] "Phosphoric acid, dimethyl pentyl ester"
[167] "2H-Pyran-2-one, tetrahydro-6-pentyl-"
[168] "Benzene, 1,2-dimethoxy-4-(1-propenyl)-, (E)-"
[169] "7-Octadecyne, 2-methyl-"
[170] "Metacetamol"
[171] "5-Nonyl-1H-[1,2,4]triazol-3-ylamine"
[172] "6-Dodecene, (Z)-"
[173] "Butanoic acid, ethyl ester"
[174] "(Z)-Ethyl pentadec-9-enoate"
[175] "Propanoic acid, 2-methoxy-, methyl ester"
[176] "1,3-Benzenediol, 4,5-dimethyl-"
[177] "Dodecanoic acid, ethyl ester"
[178] "Pentanoic acid, 4-methyl-3-oxo-, ethyl ester"
[179] "Ketone, phenyl 2-thiazolyl"
[180] "Benzenepropanoic acid 1-methylethyl ester"
[181] "Butane, 2-methyl-3-(methylthio)-"
$`up-Stage I v.s. Stage II:up-Stage I v.s. Stage III`
[1] "Benzenepropanoic acid, hexyl ester"
[2] "6-Tetradecanone"
[3] "2,3-Dimethylpentanoic acid"
[4] "2,5,6-Trimethylbenzimidazole"
[5] "gamma-Tetradecalactone"
[6] "3-Undecene, 4-methyl-"
[7] "Cyclopentadecanone"
[8] "2,3-Hexanedione"
[9] "3,5-Octanedione, 2,7-dimethyl-"
[10] "3-Hydroxymethylene-1,7,7-trimethylbicyclo[2.2.1]heptan-2-one"
[11] "Flopropione"
[12] "Benzene"
[13] "Ethyl 3-furoate"
[14] "3-Decenoic acid, (E)-"
[15] "Propanoic acid"
[16] "5,7-Dodecadiene, (Z,Z)-"
[17] "2,4-Diamino-1,3,5-triazine"
[18] "1,3-Cyclopentadiene"
[19] "9-Oxabicyclo[4.2.1]non-7-en-3-one"
[20] "2-((3,3-Dimethyloxiran-2-yl)methyl)-3-methylfuran"
[21] "2-Benzofuranmethanol, 2,4,5,6,7,7a-hexahydro-4,4,7a-trimethyl-, cis-"
[22] "2-Ethyl-2,3-dihydro-1H-indene"
[23] "2-Undecanol"
[24] "Furan, 2-(1,2-diethoxyethyl)-"
[25] "2(3H)-Furanone, 5-heptyldihydro-"
[26] "2,4,6-Cycloheptatrien-1-one, 2-hydroxy-4-(1-methylethyl)-"
[27] "2-Heptenoic acid, ethyl ester, (E)-"
[28] "1,2-Dihexylcyclopropene-3-carboxylic acid"
[29] "2-Tridecanone"
[30] "3-Ethyl-4,4-dimethyl-2-(2-methylpropenyl)cyclohex-2-enone"
[31] "Cyclohexane, (2-ethyl-1-methylbutylidene)-"
[32] "Thiazole, 2-methyl-"
[33] "2-Methyl-4-decanone"
[34] "2-Nonanol"
[35] "5-Undecanol, 2-methyl-"
[36] "Undecanoic acid, 2-methyl-"
[37] "4-Undecene, 8-methyl-, (Z)-"
[38] "Octanoic acid, 3-methylbutyl ester"
[39] "Adamantane-1,3-diol"
[40] "Isopentyl hexanoate"
[41] "N-Acetylpyrrolidone"
[42] "2-Ethylbutyric acid, heptyl ester"
[43] "(3aR,4R,8R,8aS)-3a,4,8a-Trimethyl-7-methylenedecahydro-4,8-methanoazulene-rel-"
[44] "1-Tetradecanol"
[45] "Isopropyl Alcohol"
[46] "2-Decene, 7-methyl-, (Z)-"
[47] "1,1'-Biphenyl, 4-methyl-"
[48] "1,3-Benzenediol, 4-propyl-"
[49] "Cyclopentanol, 1,2-dimethyl-3-(1-methylethenyl)-, [1R-(1a,2beta,3a)]-"
[50] "Tetradecane"
$`up-Stage I v.s. Stage II:up-Stage II v.s. Stage III:up-Stage I v.s. Stage III`
[1] "4-Octanol, 7-methyl-" "Pentane, 1-ethoxy-"
[3] "4-Heptanol, 2,6-dimethyl-" "2-Methyl-3-decanol"
$`PLS-DA\nVIP+CI+FDR`
[1] "9-Octadecynoic acid"
[2] "Pyridine, 3-ethyl-"
[3] "1-Pentanethiol"
[4] "3-Heptyne, 5-methyl-"
[5] "Naphthalene, 1,2,3,4-tetrahydro-5-methyl-1-(1-methylethyl)-"
[6] "Heptadecane"
[7] "Ethyl formate"
[8] "2H-Pyran, 2-ethoxytetrahydro-4-methyl-"
[9] "3-Dodecylcyclohexanone"
[10] "Cyclopentanone, 3,3,4-trimethyl-4-(4-methylphenyl)-"
[11] "Benzenamine, N-propyl-"
[12] "1,3-Dioxane-5-methanol, 5-ethyl-"
[13] "Pyridine, 3-ethenyl-"
[14] "1-Pentadecene"
[15] "2H-Pyran-3(4H)-one, 6-ethenyldihydro-2,2,6-trimethyl-"
[16] "Spiro[3.6]deca-5,7-dien-1-one,5,9,9-trimethyl"
[17] "4-Methoxy-5H-furan-2-one"
[18] "1-Butanol"
[19] "Methyl 8-(2-furyl)octanoate"
[20] "Benzenebutanenitrile"
[21] "1,3-Nonadiene, (E)-"
[22] "Disulfide, dimethyl"
[23] "Methyl anthranilate"
[24] "1H-Indene, 2,3-dihydro-1,1,5,6-tetramethyl-"
[25] "2,4-Decadien-1-ol"
[26] "3-Ethylcyclopentanone"
[27] "1,3-Octadiene"
[28] "1-Butanamine, N-(1-propylbutylidene)-"
[29] "10-Undecenoyl chloride"
[30] "Anabasine, 1-nitroso-"
$`PLS-DA\nVIP+CI+FDR:up-Stage I v.s. Stage III`
[1] "Undecanoic acid, ethyl ester" "3,5-Dimethyl-2,4,6-trichloroanisole"
[3] "Indole" "Ethyl tridecanoate"
[5] "Ethyl cyclohexanepropionate" "Heptadecanoic acid, ethyl ester"
[7] "Heptanoic acid, ethyl ester"
$`PLS-DA\nVIP+CI+FDR:up-Stage II v.s. Stage III`
[1] "Nonanal"
[2] "Undecanal"
[3] "1-(1,2,3-Trimethyl-cyclopent-2-enyl)-ethanone"
[4] "n-Amyl ether"
[5] "Pyrazine"
[6] "Pyridine, 2-hexyl-"
[7] "Dodecanal"
[8] "9-Oxabicyclo[3.3.1]nona-2,6-diene"
[9] "Tridecanal"
[10] "Pyridine, 2-(1-methylethyl)-"
[11] "Furan"
[12] "Azelaaldehydic acid, butyl ester"
[13] "Hexanal, 2-ethyl-"
[14] "Oxirane, pentyl-"
[15] "Octanal"
[16] "3-Tetradecyn-1-ol"
[17] "1,8(2H,5H)-Naphthalenedione, hexahydro-8a-methyl-, cis-"
[18] "Propanal, 2-methyl-"
[19] "Methional"
[20] "Heptanal"
[21] "5-Hydroxy-2-pyridinecarbaldehyde"
[22] "Ethanone, 1-(3-pyridinyl)-"
[23] "2-Pentenal, (E)-"
[24] "Benzenamine, N,N-dibutyl-"
[25] "Hexanal"
[26] "2,4-Nonadienal, (E,E)-"
[27] "Furan, 2-propyl-"
[28] "12-Oxododecanoic acid, ethyl ester"
[29] "Decanal"
[30] "2-Penten-1-ol, (E)-"
[31] "3-Decen-2-one, 3-methyl-"
$`PLS-DA\nVIP+CI+FDR:up-Stage II v.s. Stage III:up-Stage I v.s. Stage III`
[1] "Hexane, 1-(1-ethoxyethoxy)-"
[2] "Methane, diethoxy-"
[3] "Naphthalene, 1,6-dimethyl-4-(1-methylethyl)-"
[4] "Ethyl-2-benzofuran"
[5] "5-Ethyl bicyclo[2.2.1]-2-heptene"
[6] "4-(Propan-2-yloxy)phenol"
[7] "1,7-Dimethyl-4-(1-methylethyl)cyclodecane"
[8] "Diethyl azelate"
[9] "Ethane, 1,1-diethoxy-"
[10] "Furan, tetrahydro-2,2-dimethyl-5-(1-methylpropyl)-"
[11] "1,3-Dioxepane, 2-heptyl-"
[12] "1-Tetradecene"
[13] "Stemphol"
[14] "Methyl 11-oxo-9-undecenoate"
[15] "Furan, 2-(1-pentenyl)-, (E)-"
[16] "(Z)-Undec-6-en-2-one"
[17] "Furfural"
[18] "Nonanohydrazide"
[19] "Cyclobutaneethanol, 1-methyl-2-(1-methylethenyl)-, cis-"
[20] "2-ACETYLDECANOIC ACID, ETHYL ESTER"
[21] "Ethyl methanesulfinate"
[22] "1,3,6,10-Dodecatetraene, 3,7,11-trimethyl-, (Z,E)-"
[23] "Cyclopentanecarboxaldehyde"
[24] "1H-Inden-1-ol, 2,3-dihydro-2-methyl-"
[25] "Pentane, 1,1-diethoxy-"
[26] "8-Hexadecyne"
[27] "Thiazole, 5-butyl-"
[28] "Butane, 1,1-diethoxy-3-methyl-"
[29] "2,4,4-Trimethyl-3-(3-methylbutyl)cyclohex-2-enone"
[30] "Acetic acid, 2-(4-methyl-2-thiazolyl)-, ethyl ester"
[31] "Benzene, propyl-"
[32] "Dodecanedioic acid, dimethyl ester"
[33] "Tetradecanal"
[34] "10,11-Epoxycalamenene"
[35] "1-Ethyl-5-methylcyclopentene"
[36] "2-Dodecanone"
[37] "3-Pentanol, 3-methyl-"
[38] "Cyclohexane, ethoxy-"
[39] "1-Pentene, 3-ethyl-2-methyl-"
[40] "2-Heptenoic acid"
[41] "Phenol, 2-(2-methyl-2-propenyl)-"
[42] "3-Cyclohexene-1-carboxaldehyde"
[43] "2-Hepten-3-ol, 4,5-dimethyl-"
[44] "Ethyl 9-decenoate"
[45] "4-Quinolinecarboxaldehyde"
$`PLS-DA\nVIP+CI+FDR:up-Stage I v.s. Stage II`
[1] "Ether, tert-butyl isopropylidenecyclopropyl"
[2] "1-Decene"
[3] "1-Octene, 3,7-dimethyl-"
[4] "Butanoic acid, 3-methyl-, propyl ester"
[5] "L-Leucine, ethyl ester"
[6] "n-Propyl acetate"
[7] "Tetradecanoic acid, propyl ester"
[8] "2-Pentanone, 3-methyl-"
[9] "1-Butanol, 3-methyl-, acetate"
[10] "9-Octadecene, 1,1-dimethoxy-, (Z)-"
[11] "Octadecanoic acid, ethyl ester"
[12] "Acetic acid, heptyl ester"
[13] "1-Pentanol, 3,4-dimethyl-"
[14] "Benzhydrazide, 2-benzoyl-N2-(4-methoxybenzoyl)-"
[15] "Decanoic acid, hexyl ester"
[16] "Benzene, (methoxymethyl)-"
[17] "Cyclohexanol, 2-methyl-, trans-"
[18] "Cyclopropaneacetic acid, 2-hexyl-"
[19] "1-Heptene, 2-pentyl-"
[20] "2-Pyridinecarboxylic acid, ethyl ester"
[21] "2(3H)-Furanone, dihydro-5-(2-octenyl)-, (Z)-"
[22] "Isobutyl acetate"
[23] "beta-Myrcene"
[24] "Phenol, 4-(3-methyl-2-butenyl)-"
[25] "Ethyl tiglate"
[26] "1-Octanol, 2-butyl-"
[27] "Caprolactam"
[28] "Pentane, 1-(methylthio)-"
[29] "Pentanoic acid, propyl ester"
[30] "p-Cresol"
[31] "Benzene, 1,3-dimethoxy-5-(8Z)-8-pentadecen-1-yl-"
[32] "3-Methyl-1-dodecyn-3-ol"
[33] "4-Hydroxy-a-Thujone"
[34] "2,6,10,10-Tetramethyl-1-oxaspiro[4.5]decan-6-ol"
[35] "Butanoic acid, 2-ethyl-, butyl ester"
[36] "Thiophene, 2-hexyl-"
[37] "Ethyl 2-methylcyclopropanecarboxylate"
[38] "Thiazole, 5-ethenyl-4-methyl-"
[39] "Ethyl cyclopropanecarboxylate"
[40] "Propanoic acid, ethyl ester"
[41] "2-Hydroxyethyl isobutyl sulfide"
[42] "2-Methyl-2-nonanol"
[43] "Methyl pentyl disulfide"
[44] "2-Hydroxy-3-hexanone"
[45] "Butane, 1-methoxy-3-methyl-"
[46] "Hexanoic acid, 3-hydroxy-, ethyl ester"
[47] "6-Tridecanol"
[48] "Diethyl pimelate"
[49] "2-Nonenoic acid, 2-methyl-, ethyl ester"
[50] "1,2-Cyclohexanediol, 1-methyl-, trans-"
[51] "2-Methyl-3-furanthiol"
[52] "Cyclohexane, 1,1,2-trimethyl-3,5-bis(1-methylethenyl)-, (2a,3a,5beta)-"
[53] "Ethyl trans-2-decenoate"
[54] "2-Methyl-7-exo-vinylbicyclo[4.2.0]oct-1(2)-ene"
[55] "trans-2-Dodecenoic acid"
[56] "Pentane, 1,1'-thiobis-"
[57] "Benzene, 1-ethyl-3-methyl-"
[58] "Hexyl tiglate"
[59] "aR-Turmerone"
[60] "4-Decenoic acid, 3-methyl-, (E)-"
[61] "Ethyl decyne carbonate"
[62] "Methyleugenol"
[63] "Hexadecanoic acid, propyl ester"
[64] "1-Hexanone, 1-(2-pyridinyl)-"
[65] "Dodecanoic acid, hexyl ester"
[66] "Decanoic acid, ethyl ester"
$`PLS-DA\nVIP+CI+FDR:up-Stage I v.s. Stage II:up-Stage I v.s. Stage III`
[1] "Ethyl 2-hydroxy-3-phenylpropanoate"
[2] "Ethaneperoxoic acid, 1-cyano-1-[2-(2-phenyl-1,3-dioxolan-2-yl)ethyl]pentyl ester"
[3] "(E)-9-Octadecenoic acid ethyl ester"
[4] "Heptane"
[5] "Octane"
[6] "4-Tridecen-1-ol, acetate, (E)-"
[7] "Cyclohexanepropanol, 2,2-dimethyl-6-methylene-"
[8] "Octanoic acid, 2-butyl-"
[9] "n-Decanoic acid"
[10] "Propanoic acid, 2-hydroxy-, ethyl ester"
[11] "Copaene"
[12] "Benzene, pentyl-"
[13] "Hexadecanoic acid, methyl ester"
[14] "3-Hepten-1-ol, (Z)-"
[15] "Pentanoic acid, ethyl ester"
[16] "1-Hexadecanol"
[17] "Hexanoic acid, propyl ester"
[18] "6-Tridecanone"
[19] "Benzenepropanoic acid, ethyl ester"
[20] "cis-5-Dodecenoic acid"
[21] "1,3,5-Trifluorobenzene"
[22] "Cyclopentene, 5-hexyl-3,3-dimethyl-"
[23] "Acetic acid, octyl ester"
[24] "Butanoic acid, 3-methyl-, hexyl ester"
[25] "1-Propanol"
[26] "Propanoic acid, 2-methyl-, ethyl ester"
[27] "3-Undecanone"
[28] "Butanoic acid, 3-methyl-, ethyl ester"
[29] "Propanoic acid, 2-methyl-"
[30] "Ethyl 5-methylhexanoate"
[31] "Nonane"
[32] "2(5H)-Furanone"
[33] "1-Undecene"
[34] "2-Propenoic acid, ethyl ester"
[35] "Benzene, 1-heptenyl-"
[36] "Butanoic acid, 2-methyl-, ethyl ester"
$`PLS-DA\nVIP+CI+FDR:up-Stage I v.s. Stage II:up-Stage II v.s. Stage III:up-Stage I v.s. Stage III`
[1] "n-Caprylic acid isobutyl ester"
[2] "2-(4-Methoxyphenyl)ethanol"
[3] "Cyclopentene,1-hexyl-"
[4] "2-Heptadecanone"
[5] "3-(4-Methoxyphenyl)propionic acid ethyl ester"
[6] "Methoxyacetic acid, hexyl ester"
[7] "Butanedioic acid, diethyl ester"

## Sheet: down-8135d7676cd1a7e5.overlap
$`down-Stage I v.s. Stage III`
[1] "1-Octen-3-ol"
[2] "Undecane, 4,6-dimethyl-"
[3] "Bicyclo[3.2.0]heptan-2-one, 6-hydroxy-5-methyl-6-vinyl-"
[4] "2-Methyl-2-bornene"
[5] "(CH3)2C=CHCN"
[6] "Isoquinoline, 1-methyl-"
[7] "a-Cubebene"
[8] "5-Undecene, 3-methyl-, (E)-"
[9] "Propanamide, N-phenyl-"
[10] "trans-8a-Methylperhydroazulen-4(1H)-one"
[11] "Oxirane, 3-ethyl-2,2-dimethyl-"
[12] "2-Nonen-1-ol, 2-methyl-"
[13] "1,4-Nonadiene, 2-nitro-, (Z)-"
[14] "Cyclododecyne"
[15] "Cyclododecene"
[16] "2-Ethyl-6-isopropyl pyridine"
[17] "N,N-Diethyl-N'-formyl-N'-methoxyurea"
[18] "Pentylidenecyclohexane"
[19] "Tridecane, 3-methyl-"
[20] "Cyclopentane, nitro-"
[21] "2-p-Tolylpyridine"
[22] "5-Hexyl-5-methyloxolan-2-one"
[23] "2-Hexanol, 2,5-dimethyl-, (S)-"
[24] "4-Ethylthiane"
[25] "Pyrazine, tetramethyl-"
[26] "Caryophyllenyl alcohol"
[27] "Benzo[b]thiophene, 2-ethyl-"
[28] "3-Nonen-1-ol, (Z)-"
[29] "Ethyl 3-methyl-2-oxobutyrate"
[30] "Cyclopentanol, 3-methyl-2-(2-pentenyl)-"
[31] "4-Hepten-1-ol"
$`down-Stage II v.s. Stage III`
[1] "6-Methyl-3,5-heptadiene-2-one"
[2] "1-Pentyn-3-ol"
[3] "4-Decen-6-yne, (Z)-"
[4] "Trans-2-heptenoic acid"
[5] "Hexane, 1-methoxy-"
[6] "3a,6-Methano-3aH-indene, 2,3,4,5,6,7-hexahydro-"
[7] "Butanoic acid, 2-methyl-, propyl ester"
[8] "6-Tridecene, 7-methyl-"
[9] "d-Dodecalactone"
[10] "4-Cyclohexyl-1-butanol"
[11] "Diisopropylaminoacrylonitryl"
[12] "1,3-Cyclohexadiene, 5-butyl-"
[13] "2-Nonanol"
[14] "2(1H)-Pentalenone, 3,3a,4,6a-tetrahydro-"
[15] "1,6-Octadien-3-ol, 3,7-dimethyl-, formate"
[16] "Benzene, pentamethyl-"
[17] "Diethyl carbonate"
[18] "Pyrazine, 2-methoxy-3-(1-methylpropyl)-"
[19] "Benzoic acid, 2,3-dimethyl-, methyl ester"
[20] "2,6-Octadien-1-ol, 3,7-dimethyl-, (Z)-"
[21] "Phenol, p-tert-butyl-"
[22] "Triisobutyl phosphate"
[23] "2,4-Dimethylcyclohex-3-ene-1-carbaldehyde"
[24] "(1-Methylenebut-2-enyl)benzene"
[25] "2-Cyclohexen-1-ol, 1-butyl-3-methyl-"
[26] "6,10-Dodecadien-1-ol, 3,7,11-trimethyl-"
[27] "Propanoic acid, 2-methyl-, 2-ethyl-3-hydroxyhexyl ester"
[28] "2-Pentanol"
[29] "1,7-Octadien-3-ol, 2,6-dimethyl-"
[30] "2-Butanone, 3,4-epoxy-3-ethyl-"
[31] "Cyclohexanone, 2-(hydroxymethylene)-3-methyl-6-(1-methylethyl)-"
[32] "1H-Pyrrolo[2,3-b]pyridine, 2-methyl-"
[33] "1-Decanol"
[34] "3-Octanol, acetate"
[35] "3-Decen-2-ol, (E)-"
[36] "1-(7-Hydroxy-1,6,6-trimethyl-10-oxatricyclo[5.2.1.0(2,4)]dec-9-yl)ethanone"
[37] "4-Decen-6-yne, (E)-"
[38] "Pyridine, 3-(phenylmethyl)-"
[39] "Benzyl alcohol"
[40] "2-Butanol, 2,3-dimethyl-, acetate"
[41] "5-Hepten-1-ol, 2,6-dimethyl-"
[42] "Vinyl trans-cinnamate"
[43] "2-Decen-1-ol, (E)-"
[44] "Benzene, 1,2,3-trimethyl-"
[45] "Phenol, 3-methyl-6-propyl-"
[46] "5-Undecanone, 2-methyl-"
[47] "Hexanoic acid, 2-tetradecyl ester"
[48] "Oxirane, tetradecyl-"
[49] "3-Phenylpropanol, 2'-hydroxy-3,3,3',4'-tetramethyl-"
[50] "Cyclohexanone, 2-methyl-"
[51] "Dodecanoic acid, methyl ester"
[52] "Butane, 1-fluoro-"
[53] "Bicyclo[3.1.0]hex-2-ene, 4-methylene-1-(1-methylethyl)-"
[54] "Oxirane, [(hexyloxy)methyl]-"
[55] "Benzene, 1,2,4,5-tetramethyl-"
[56] "5,9-Undecadien-2-ol, 6,10-dimethyl-"
[57] "Benzeneethanol, a-(phenylmethyl)-"
[58] "1-Butanol, 3-methyl-"
[59] "5-Pentylcyclohexa-1,3-diene"
[60] "Methyl Isobutyl Ketone"
[61] "Pyrazine, trimethyl-"
[62] "Cyclopentadecanone"
[63] "Diethyl carbitol"
[64] "Benzenepentanoic acid, methyl ester"
[65] "(-)-Myrtenol"
[66] "Benzenamine, N-(2,2-dimethylpropyl)-N-methyl-"
[67] "Benzofuran, 2,3-dihydro-"
[68] "1,5-Dimethyl-6-oxa-bicyclo[3.1.0]hexane"
[69] "Octane, 2,6,6-trimethyl-"
[70] "1,8(2H,5H)-Isoquinolinedione, 6,7-dihydro-3-hydroxy-"
[71] "Bicyclo[2.2.1]heptane-2,3-diol, 1,7,7-trimethyl-, (exo,exo)-"
[72] "Butane, 2-methyl-3-(methylthio)-"
[73] "1-Hexanol, 2-ethyl-"
[74] "(1S,4aS,4bS,7S,8aS,10aS)-7-Isopropyl-1,4a-dimethyltetradecahydrophenanthrene"
[75] "trans-2-undecenoic acid"
[76] "6-Hepten-2-ol, 2,6-dimethyl-"
[77] "Undecanoic acid, 2-methyl-"
[78] "Ethyl trans-4-decenoate"
[79] "Furan, 3-(4-methyl-3-pentenyl)-"
[80] "Benzeneacetamide, 4-chloro-a-(4-chlorophenyl)-a-methoxy-N,N-dimethyl-"
[81] "Cyclopentadiene, 2,5,5-trimethyl-"
[82] "1H-Indene, 2,3-dihydro-1,1-dimethyl-"
[83] "5H-1-Pyrindine, 6,7-dihydro-"
[84] "Butane, 1-isocyano-"
[85] "cis-3-Butyl-4-vinyl-cyclopentene"
[86] "(2E,4E)-2,4-Dodecadienoic acid"
[87] "Bicyclo[5.1.0]octane, 8-(1-methylethylidene)-"
[88] "Aniline"
[89] "(3E,5Z)-1,3,5-Undecatriene"
[90] "Decanoic acid, methyl ester"
[91] "2-Cyclopentene-1-butanal, gamma,gamma,2,3-tetramethyl-"
[92] "Butanoic acid, hexyl ester"
[93] "Benzoic acid, 4-(3-hydroxy-3-methyl-1-butynyl)-, methyl ester"
[94] "(-)-beta-Bourbonene"
[95] "Prenol"
[96] "4-(2-Furyl)-1,3-thiazol-2-ylamine"
[97] "2H-Pyran-2-one, tetrahydro-6-pentyl-"
[98] "n-Tridecan-1-ol"
[99] "Benzene, 1,2-dimethoxy-4-(1-propenyl)-, (E)-"
[100] "Cyclohexanol, 2-methyl-5-(1-methylethyl)-, (1a,2a,5a)-"
[101] "Tricyclo[4.2.2.0(2,5)]dec-7-en-3-one"
[102] "2-Isopropyl-5-methyl-1-heptanol"
[103] "7-Octadecyne, 2-methyl-"
[104] "Bicyclo[3.1.0]hexan-2-one, 3,3,6-trimethyl-"
[105] "2-Methoxy-1,3-dioxolane"
[106] "1,2,4-Trithiolane"
[107] "Cyclopentanecarboxylic acid, ethenyl ester"
[108] "5-Hepten-2-ol, 6-methyl-"
[109] "Thiophene, 2-butyl-5-hexyl-"
[110] "1,4-Hexadiene, 4-methyl-"
[111] "Benzenemethanol, 2,4-dichloro-"
[112] "Butanoic acid, ethyl ester"
[113] "Alanine"
[114] "3,5-di-tert-Butyl-4-hydroxybenzaldehyde"
[115] "2-Pentanamine, N-ethyl-4-methyl-"
[116] "Phenol"
[117] "2(3H)-Benzofuranone, hexahydro-4,4,7a-trimethyl-"
[118] "1,4-Undecadiene, (E)-"
[119] "trans-Hexahydrophthalide"
[120] "2-METHYL-CYCLOHEXA-1,3-DIENE"
[121] "Biphenylene, 1,2,3,6,7,8,8a,8b-octahydro-4,5-dimethyl-"
[122] "Cyclopentene, 4,4-dimethyl-"
[123] "Propanoic acid, 2-methyl-, hexyl ester"
[124] "(4aS)-3,5,5,9-Tetramethyl-1,2,5,6,7,8-hexahydro-4a,8-epoxybenzo[7]annulene"
[125] "1-Propanol, 3-(methylthio)-"
[126] "Benzene, heptyl-"
[127] "2-(1-Methylcyclopentyloxy)-tetrahydropyran"
[128] "Phenylethyne"
[129] "Pentanoic acid, 4-methyl-3-oxo-, ethyl ester"
[130] "Naphthalene, 1,2-dimethyl-"
[131] "Hexanoic acid, 5-oxo-, ethyl ester"
[132] "Aniline, N-methyl-"
[133] "Pentanoic acid, 2-hydroxy-4-methyl-, ethyl ester"
[134] "Benzenecarbothioic acid, S-methyl ester"
[135] "3-Methyldodecanoic acid"
[136] "Retinol, acetate"
[137] "Ethyl 3-furoate"
[138] "2-Ethylbutyric acid, heptyl ester"
[139] "Acetyl valeryl"
$`down-Stage II v.s. Stage III:down-Stage I v.s. Stage III`
[1] "2,3,5-Trimethyl-6-ethylpyrazine"
[2] "1H-Pyrrole, 1-methyl-"
[3] "1-Propanone, 1-(2,4-dimethylphenyl)-"
[4] "4-Methoxyanthranilic acid"
[5] "Decane, 2,3,7-trimethyl-"
[6] "Pyrazine, 2,5-dimethyl-"
[7] "1,3-Dioxolane, 4-methyl-2-pentyl-"
[8] "Pyrazine, 2,6-dimethyl-"
[9] "1H-Indene, 3-butyl-1-methyl-"
[10] "2,6-Lutidine"
[11] "3-Methylbut-2-en-1-yl pivalate"
[12] "4-Isopropylpyridine"
[13] "trans,trans-nona-2,4-dienol"
[14] "cis,cis-4,6-Octadienol"
$`down-Stage I v.s. Stage II`
[1] "Furan, 2,5-diethyltetrahydro-"
[2] "Pyridine, 4-pentyl-"
[3] "Hexanoic acid, anhydride"
[4] "2-(5-Methyl-2-furyl)piperidine"
[5] "4-Pentenoic acid ethyl ester"
[6] "2-Hexyl-2-cyclopenten-1-one"
[7] "2-Propanol, 1-methoxy-"
[8] "6,7-Epoxy-trans-syn-tricyclo[7.3.0.0(2,6)]dodecane, (+-) (6S, 7R)-"
[9] "Pyridine, 2-methyl-"
[10] "1H-Inden-1-one, octahydro-"
[11] "Cyclohexanone, 4-hydroxy-4-methyl-"
[12] "Caprylic anhydride"
[13] "2-Propenal"
[14] "1-Octanol"
[15] "1,3-Oxathiane"
[16] "1-Decyn-4-ol"
[17] "3-Ethyl-1-heptyne-3-ol"
[18] "Dichloroacetic acid, dodecyl ester"
[19] "2,5-di-tert-Butyl-1,4-benzoquinone"
[20] "3-Octanone"
[21] "2-Methyl-4-octenal"
[22] "2-(2-Furyl)piperidine"
[23] "2-Pentanone, 1-(3-furanyl)-4-methyl-"
[24] "Benzaldehyde, 4-butyl-"
[25] "3-Penten-1-ol"
[26] "Cyclopentanone, 2-methyl-"
[27] "3-[(4-Fluoroanilino)carbonyl]-1,2,2-trimethylcyclopentanecarboxylic acid"
[28] "3,5-Octadiene, 2,7-dimethyl-, (Z,Z)-"
[29] "2-Hexen-1-ol, (E)-"
[30] "Hexanal, 3-methyl-"
[31] "Aluminum, triethyl-"
[32] "(+)-2-Bornanone"
[33] "Nonanoyl chloride"
[34] "Benzoic acid, 3-methylbutyl-2 ester"
[35] "3-Cyclohexene-1-carboxaldehyde, 4-methyl-"
[36] "5-Heptenal, 2,6-dimethyl-"
[37] "Decanoic acid, octyl ester"
[38] "2-Isoamyl-6-methylpyrazine"
[39] "Phenol, 2-butyl-"
[40] "3-Nonen-2-one"
[41] "Pentanal"
[42] "1-Butanone, 1-bicyclo[4.1.0]hept-7-yl-"
[43] "4-Octanol, 4,7-dimethyl-"
[44] "trans-3-Methyl-2-n-propylthiophane"
[45] "Bicyclo[3.1.0]hex-2-ene, 2-methyl-5-(1-methylethyl)-"
[46] "p-Propargyloxytoluene"
[47] "Ethanone, 1-(4-methylphenyl)-"
[48] "3,4-Dichlorophenyl isothiocyanate"
[49] "2-Butylhept-2-enal"
[50] "4-Pyridinecarboxaldehyde"
[51] "2-n-Butylacrolein"
[52] "Ethyl hydrogen fumarate"
[53] "3-Nonen-5-yne, 4-ethyl-"
[54] "2,4-Hexadienal, (E,E)-"
[55] "4-Heptenal, (Z)-"
[56] "Dibenzofuran"
[57] "(1H)Pyrrole-3-carbonitrile, 2-methyl-"
[58] "trans,trans-3,5-Heptadien-2-one"
[59] "1,2-Benzenedicarboxylic acid, bis(1-methylethyl) ester"
[60] "2-Undecenal"
[61] "Neral"
[62] "2-Octenal, (E)-"
[63] "2-Butenal, (E)-"
[64] "2,4-Heptadienal, (E,E)-"
[65] "Pyrroline, 5-butyl-2-[1,3-heptadienyl]-"
[66] "3-Heptanone"
[67] "3-Butyn-2-amine, 2-methyl-"
[68] "1-Octene"
[69] "Pyridine, 3-methyl-2-phenyl-"
[70] "Cyclopentane-3'-spirotricyclo[3.1.0.0(2,4)]hexane-6'-spirocyclopentane"
[71] "Tridecanenitrile"
[72] "3,5,11-Eudesmatriene"
[73] "Hexanoic acid, 1-methylethyl ester"
[74] "1,5-Heptadiene, 3,3-dimethyl-, (E)-"
[75] "Cyclopentene, 3-methyl-"
[76] "p-Sec-butylphenyl acetate"
[77] "3-Hydroxypyridine monoacetate"
[78] "3-Octen-2-one"
[79] "Carane, 4,5-epoxy-, trans"
[80] "Furan, 2,5-dibutyl-"
[81] "1-(1,2-Dimethyl-cyclopent-2-enyl)-ethanone"
[82] "Thiazole-4-carboxaldehyde"
[83] "2-Octen-1-ol, (E)-"
[84] "Furan, 2-ethyl-"
[85] "Benzoin"
[86] "Bicyclo[2.2.2]octane, 1,2,3,6-tetramethyl-"
[87] "3(2H)-Pyridazinone, 6-methyl-"
[88] "5-Undecen-3-yne, (Z)-"
[89] "Benzaldehyde, 4-propyl-"
[90] "1-Butanamine, N-(2-furanylmethylene)-3-methyl-"
[91] "2-Heptenal, (E)-"
[92] "3,5-Di-tert-butyl-2-hydroxybenzonitrile"
[93] "1-Pentanone, 1-(2-pyridinyl)-"
[94] "2-Pentanone, 5-hydroxy-"
[95] "Thiomorpholine, 4-nitroso-"
[96] "Benzoxazole, 2-methyl-"
[97] "2-Decenal, (E)-"
[98] "4-Nonene"
[99] "7-Dodecen-6-one"
[100] "3,5,9-Undecatrien-2-one, 6,10-dimethyl-, (E,Z)-"
[101] "4,6-Heptadien-2-one, 3,6-dimethyl-3-(1-methylethyl)-, (E)-"
[102] "2-Heptanone, 6-(2-furanyl)-6-methyl-"
[103] "4-Hydroxy-2,6,6-trimethyl-3-oxocyclohexa-1,4-dienecarbaldehyde"
[104] "2,2-Dimethyl-3-heptanone"
[105] "1H-Indene-4-carboxaldehyde, 2,3-dihydro-"
[106] "2-Hexenal, (E)-"
[107] "2-Decanone"
[108] "2-Butenal, 3-methyl-"
[109] "Benzeneacetic acid, a-oxo-, ethyl ester"
[110] "(E,E)-7,11,15-Trimethyl-3-methylene-hexadeca-1,6,10,14-tetraene"
[111] "Ethanone, 2,2-dihydroxy-1-phenyl-"
[112] "2,5-Pyrrolidinedione, 1-methyl-"
[113] "5,6-Decanedione"
[114] "2,4-Octadienal, (E,E)-"
[115] "1,3-Benzenediol, 5-pentyl-"
[116] "Pyridine, 2-ethyl-"
$`down-Stage I v.s. Stage II:down-Stage I v.s. Stage III`
[1] "2-Chloro-4,5-dimethoxybenzaldehyde"
[2] "Pentadecane, 5-methyl-"
[3] "1,4-Cyclohex-2-enedione"
[4] "2-Isoamylpyrazine"
[5] "1,4-Octadiene"
[6] "Naphthalene, 3-(1,1-dimethylethyl)-1,2-dihydro-"
[7] "3-Octanone, 4-methyl-"
[8] "Eugenol"
[9] "Tridecane, 4-methyl-"
[10] "Benzene, 1,1'-(1,2-ethanediyl)bis[2,3,4,5,6-pentamethyl-"
[11] "4-Isopropyl-5,5-dimethyl-5H-furan-2-one"
[12] "6-Hepten-3-ol, 4-methyl-"
[13] "1H-Indole, 2,3-dihydro-1,2-dimethyl-"
[14] "Antibiotic NFAT 133"
[15] "2-Methoxyresorcinol"
[16] "Naphthalene, 1-methyl-7-(1-methylethyl)-"
[17] "Pyridine, 3-methyl-"
[18] "Octan-2-one, 3,6-dimethyl-"
[19] "1-Naphthalenecarbonitrile"
[20] "2-t-Butyl-5-propyl-[1,3]dioxolan-4-one"
[21] "2-Nonen-1-ol, (Z)-"
[22] "Phenol, 3-methyl-5-(1-methylethyl)-, methylcarbamate"
[23] "2,4-Undecadienal"
[24] "Etonitazene"
[25] "p-Pentylaniline"
[26] "Undecanoic acid, 10-oxo-, ethyl ester"
[27] "1-Phenyl-5-methylheptane"
[28] "Butanedioic acid, phenyl-"
[29] "Caffeine"
[30] "1,3-Dioxolane, 2,4,5-trimethyl-"
$`down-Stage I v.s. Stage II:down-Stage II v.s. Stage III:down-Stage I v.s. Stage III`
[1] "Naphth[1,2-b]oxirene, decahydro-1a,7-dimethyl-"
$`PLS-DA\nVIP+CI+FDR`
[1] "1-Pentanethiol"
[2] "Ethaneperoxoic acid, 1-cyano-1-[2-(2-phenyl-1,3-dioxolan-2-yl)ethyl]pentyl ester"
[3] "Hexane, 1-(1-ethoxyethoxy)-"
[4] "Heptane"
[5] "Undecanal"
[6] "Naphthalene, 1,6-dimethyl-4-(1-methylethyl)-"
[7] "Octane"
[8] "Undecanoic acid, ethyl ester"
[9] "Heptadecane"
[10] "Ethyl formate"
[11] "2H-Pyran, 2-ethoxytetrahydro-4-methyl-"
[12] "4-Tridecen-1-ol, acetate, (E)-"
[13] "4-(Propan-2-yloxy)phenol"
[14] "Octadecanoic acid, ethyl ester"
[15] "n-Decanoic acid"
[16] "1,7-Dimethyl-4-(1-methylethyl)cyclodecane"
[17] "1-Pentanol, 3,4-dimethyl-"
[18] "Diethyl azelate"
[19] "Propanoic acid, 2-hydroxy-, ethyl ester"
[20] "Ethane, 1,1-diethoxy-"
[21] "Copaene"
[22] "1,3-Dioxepane, 2-heptyl-"
[23] "Benzene, pentyl-"
[24] "1-Tetradecene"
[25] "Hexadecanoic acid, methyl ester"
[26] "Stemphol"
[27] "3,5-Dimethyl-2,4,6-trichloroanisole"
[28] "2(3H)-Furanone, dihydro-5-(2-octenyl)-, (Z)-"
[29] "3-Hepten-1-ol, (Z)-"
[30] "Furan, 2-(1-pentenyl)-, (E)-"
[31] "n-Caprylic acid isobutyl ester"
[32] "(Z)-Undec-6-en-2-one"
[33] "Furfural"
[34] "Hexanal, 2-ethyl-"
[35] "Oxirane, pentyl-"
[36] "Cyclobutaneethanol, 1-methyl-2-(1-methylethenyl)-, cis-"
[37] "Pentanoic acid, ethyl ester"
[38] "Indole"
[39] "2-ACETYLDECANOIC ACID, ETHYL ESTER"
[40] "Ethyl tridecanoate"
[41] "1,3,6,10-Dodecatetraene, 3,7,11-trimethyl-, (Z,E)-"
[42] "1-Pentadecene"
[43] "Caprolactam"
[44] "6-Tridecanone"
[45] "Benzenepropanoic acid, ethyl ester"
[46] "8-Hexadecyne"
[47] "Thiazole, 5-butyl-"
[48] "2-(4-Methoxyphenyl)ethanol"
[49] "3-Tetradecyn-1-ol"
[50] "cis-5-Dodecenoic acid"
[51] "Ethyl cyclohexanepropionate"
[52] "Butane, 1,1-diethoxy-3-methyl-"
[53] "2,4,4-Trimethyl-3-(3-methylbutyl)cyclohex-2-enone"
[54] "1,3,5-Trifluorobenzene"
[55] "1-Butanol"
[56] "Heptadecanoic acid, ethyl ester"
[57] "Acetic acid, 2-(4-methyl-2-thiazolyl)-, ethyl ester"
[58] "Benzene, propyl-"
[59] "Cyclopentene, 5-hexyl-3,3-dimethyl-"
[60] "Methyl 8-(2-furyl)octanoate"
[61] "Dodecanedioic acid, dimethyl ester"
[62] "Tetradecanal"
[63] "10,11-Epoxycalamenene"
[64] "Heptanal"
[65] "2-Nonenoic acid, 2-methyl-, ethyl ester"
[66] "Acetic acid, octyl ester"
[67] "2-Dodecanone"
[68] "3-Pentanol, 3-methyl-"
[69] "1,3-Nonadiene, (E)-"
[70] "Cyclopentene,1-hexyl-"
[71] "3-Undecanone"
[72] "Heptanoic acid, ethyl ester"
[73] "Propanoic acid, 2-methyl-"
[74] "Disulfide, dimethyl"
[75] "1-Pentene, 3-ethyl-2-methyl-"
[76] "Furan, 2-propyl-"
[77] "Ethyl 5-methylhexanoate"
[78] "Nonane"
[79] "2-Heptenoic acid"
[80] "2-Heptadecanone"
[81] "2(5H)-Furanone"
[82] "3-Ethylcyclopentanone"
[83] "3-(4-Methoxyphenyl)propionic acid ethyl ester"
[84] "2-Hepten-3-ol, 4,5-dimethyl-"
[85] "Methoxyacetic acid, hexyl ester"
[86] "2-Propenoic acid, ethyl ester"
[87] "Butanedioic acid, diethyl ester"
[88] "Benzene, 1-heptenyl-"
[89] "Decanoic acid, ethyl ester"
$`PLS-DA\nVIP+CI+FDR:down-Stage II v.s. Stage III`
[1] "Ether, tert-butyl isopropylidenecyclopropyl"
[2] "1-Decene"
[3] "Ethyl 2-hydroxy-3-phenylpropanoate"
[4] "(E)-9-Octadecenoic acid ethyl ester"
[5] "1-Octene, 3,7-dimethyl-"
[6] "Butanoic acid, 3-methyl-, propyl ester"
[7] "L-Leucine, ethyl ester"
[8] "n-Propyl acetate"
[9] "Tetradecanoic acid, propyl ester"
[10] "2-Pentanone, 3-methyl-"
[11] "1-Butanol, 3-methyl-, acetate"
[12] "Cyclohexanepropanol, 2,2-dimethyl-6-methylene-"
[13] "Octanoic acid, 2-butyl-"
[14] "Acetic acid, heptyl ester"
[15] "Decanoic acid, hexyl ester"
[16] "Benzene, (methoxymethyl)-"
[17] "Cyclohexanol, 2-methyl-, trans-"
[18] "Cyclopropaneacetic acid, 2-hexyl-"
[19] "1-Heptene, 2-pentyl-"
[20] "2-Pyridinecarboxylic acid, ethyl ester"
[21] "Isobutyl acetate"
[22] "beta-Myrcene"
[23] "Phenol, 4-(3-methyl-2-butenyl)-"
[24] "1-Hexadecanol"
[25] "Ethyl tiglate"
[26] "1-Octanol, 2-butyl-"
[27] "Hexanoic acid, propyl ester"
[28] "Pentane, 1-(methylthio)-"
[29] "Pentanoic acid, propyl ester"
[30] "p-Cresol"
[31] "Benzene, 1,3-dimethoxy-5-(8Z)-8-pentadecen-1-yl-"
[32] "3-Methyl-1-dodecyn-3-ol"
[33] "4-Hydroxy-a-Thujone"
[34] "2,6,10,10-Tetramethyl-1-oxaspiro[4.5]decan-6-ol"
[35] "Butanoic acid, 2-ethyl-, butyl ester"
[36] "Thiophene, 2-hexyl-"
[37] "4-Methoxy-5H-furan-2-one"
[38] "Ethyl 2-methylcyclopropanecarboxylate"
[39] "Thiazole, 5-ethenyl-4-methyl-"
[40] "Ethyl cyclopropanecarboxylate"
[41] "Propanoic acid, ethyl ester"
[42] "2-Methyl-2-nonanol"
[43] "Methyl pentyl disulfide"
[44] "2-Hydroxy-3-hexanone"
[45] "Butane, 1-methoxy-3-methyl-"
[46] "Hexanoic acid, 3-hydroxy-, ethyl ester"
[47] "Diethyl pimelate"
[48] "1,2-Cyclohexanediol, 1-methyl-, trans-"
[49] "2-Methyl-3-furanthiol"
[50] "Cyclohexane, 1,1,2-trimethyl-3,5-bis(1-methylethenyl)-, (2a,3a,5beta)-"
[51] "Butanoic acid, 3-methyl-, hexyl ester"
[52] "1-Propanol"
[53] "Propanoic acid, 2-methyl-, ethyl ester"
[54] "Butanoic acid, 3-methyl-, ethyl ester"
[55] "Ethyl trans-2-decenoate"
[56] "2-Methyl-7-exo-vinylbicyclo[4.2.0]oct-1(2)-ene"
[57] "1H-Indene, 2,3-dihydro-1,1,5,6-tetramethyl-"
[58] "trans-2-Dodecenoic acid"
[59] "Pentane, 1,1'-thiobis-"
[60] "Benzene, 1-ethyl-3-methyl-"
[61] "1-Undecene"
[62] "Hexyl tiglate"
[63] "aR-Turmerone"
[64] "4-Decenoic acid, 3-methyl-, (E)-"
[65] "Ethyl decyne carbonate"
[66] "Methyleugenol"
[67] "Hexadecanoic acid, propyl ester"
[68] "Butanoic acid, 2-methyl-, ethyl ester"
[69] "Dodecanoic acid, hexyl ester"
$`PLS-DA\nVIP+CI+FDR:down-Stage II v.s. Stage III:down-Stage I v.s. Stage III`
[1] "9-Octadecene, 1,1-dimethoxy-, (Z)-"
[2] "Benzhydrazide, 2-benzoyl-N2-(4-methoxybenzoyl)-"
[3] "Benzenamine, N-propyl-"
[4] "2-Hydroxyethyl isobutyl sulfide"
[5] "6-Tridecanol"
[6] "Methyl anthranilate"
[7] "2,4-Decadien-1-ol"
[8] "1-Hexanone, 1-(2-pyridinyl)-"
$`PLS-DA\nVIP+CI+FDR:down-Stage I v.s. Stage II`
[1] "Nonanal"
[2] "Methane, diethoxy-"
[3] "1-(1,2,3-Trimethyl-cyclopent-2-enyl)-ethanone"
[4] "Ethyl-2-benzofuran"
[5] "n-Amyl ether"
[6] "Pyrazine"
[7] "5-Ethyl bicyclo[2.2.1]-2-heptene"
[8] "Dodecanal"
[9] "9-Oxabicyclo[3.3.1]nona-2,6-diene"
[10] "Furan, tetrahydro-2,2-dimethyl-5-(1-methylpropyl)-"
[11] "Tridecanal"
[12] "Pyridine, 2-(1-methylethyl)-"
[13] "Methyl 11-oxo-9-undecenoate"
[14] "Furan"
[15] "Azelaaldehydic acid, butyl ester"
[16] "Nonanohydrazide"
[17] "Ethyl methanesulfinate"
[18] "Octanal"
[19] "Cyclopentanecarboxaldehyde"
[20] "1H-Inden-1-ol, 2,3-dihydro-2-methyl-"
[21] "Pentane, 1,1-diethoxy-"
[22] "1,8(2H,5H)-Naphthalenedione, hexahydro-8a-methyl-, cis-"
[23] "Propanal, 2-methyl-"
[24] "Methional"
[25] "1-Ethyl-5-methylcyclopentene"
[26] "5-Hydroxy-2-pyridinecarbaldehyde"
[27] "Ethanone, 1-(3-pyridinyl)-"
[28] "2-Pentenal, (E)-"
[29] "Cyclohexane, ethoxy-"
[30] "Benzenamine, N,N-dibutyl-"
[31] "Hexanal"
[32] "2,4-Nonadienal, (E,E)-"
[33] "12-Oxododecanoic acid, ethyl ester"
[34] "Decanal"
[35] "Phenol, 2-(2-methyl-2-propenyl)-"
[36] "2-Penten-1-ol, (E)-"
[37] "3-Cyclohexene-1-carboxaldehyde"
[38] "Ethyl 9-decenoate"
[39] "3-Decen-2-one, 3-methyl-"
[40] "4-Quinolinecarboxaldehyde"
$`PLS-DA\nVIP+CI+FDR:down-Stage I v.s. Stage II:down-Stage I v.s. Stage III`
[1] "9-Octadecynoic acid"
[2] "Pyridine, 3-ethyl-"
[3] "3-Heptyne, 5-methyl-"
[4] "Naphthalene, 1,2,3,4-tetrahydro-5-methyl-1-(1-methylethyl)-"
[5] "Pyridine, 2-hexyl-"
[6] "3-Dodecylcyclohexanone"
[7] "Cyclopentanone, 3,3,4-trimethyl-4-(4-methylphenyl)-"
[8] "1,3-Dioxane-5-methanol, 5-ethyl-"
[9] "2H-Pyran-3(4H)-one, 6-ethenyldihydro-2,2,6-trimethyl-"
[10] "Spiro[3.6]deca-5,7-dien-1-one,5,9,9-trimethyl"
[11] "Benzenebutanenitrile"
[12] "1,3-Octadiene"
[13] "1-Butanamine, N-(1-propylbutylidene)-"
[14] "10-Undecenoyl chloride"
[15] "Anabasine, 1-nitroso-"
$`PLS-DA\nVIP+CI+FDR:down-Stage I v.s. Stage II:down-Stage II v.s. Stage III:down-Stage I v.s. Stage III`
[1] "Pyridine, 3-ethenyl-"
